# Supplementary material for: 3-Pyridinylidene Derivatives of Chemically Modified Lupane and Ursane Triterpenes as Promising Anticancer Agents by Targeting Apoptosis
Source: MDPI journal article supplement (doi:10.3390/ijms221910695), 2021-10-02

### 3-Pyridinylidene derivatives of chemically modified lupane and ursane triterpenes as promising anticancer agents by targeting apoptosis

Oxana Kazakova<sup>1#\*</sup>, Codruța Șoica<sup>2,3#</sup>, Marat Babaev<sup>1</sup>, Anastasiya Petrova<sup>1</sup>, El'mira Khusnutdinova<sup>1</sup>, Alexander Poptsov<sup>1</sup>, Ioana Macașoi<sup>2,3</sup>, George Drăghici<sup>2,3</sup>, Ștefana Avram<sup>2,3</sup>, Lavinia Vlaia<sup>2,4</sup>, Alexandra Mioc<sup>2,3</sup>, Marius Mioc<sup>2,3\*</sup>, Cristina Dehelean<sup>2,3</sup>, Adrian Voicu<sup>5</sup>

<sup>1</sup>*Ufa Institute of Chemistry UFRS RAS, pr. Oktyabrya 71, 450054 Ufa, Russian Federation*

<sup>2</sup>*Faculty of Pharmacy, "Victor Babes" University of Medicine and Pharmacy, 2nd Eftimie Murgu Square, Timisoara, 300041, Romania*

<sup>3</sup>*Res. Ctr. Pharmacotoxicol Evaluat, Faculty of Pharmacy, "Victor Babes" University of Medicine and Pharmacy Timisoara, 2nd Eftimie Murgu Sq., Timisoara 300041, Romania;*

<sup>4</sup>*Res. Ctr. Drug Formulation and Technology, Faculty of Pharmacy, "Victor Babes" University of Medicine and Pharmacy Timisoara, 2nd Eftimie Murgu Sq., Timisoara 300041, Romania;*

<sup>5</sup>*Faculty of Medicine, "Victor Babes" University of Medicine and Pharmacy, 2nd Eftimie Murgu Sq., Timisoara 300041, Romania*

# Authors with equal contribution jointly sharing the position of first author

\* Corresponding authors: obf@anrb.ru, marius.mioc@umft.ro

#### Abstract

Cancer persists as a global challenge due to the extent to which conventional anticancer therapies pose high risks counterbalanced with their therapeutic benefit. Natural occurring substances stand as an important safer alternative source for anticancer drug development. In the current study a series of modified lupane and ursane derivatives was subjected to *in vitro* screening on the NCI-60 cancer cell line panel. Compounds **6** and **7** emerged as highly active with GI<sub>50</sub> values ranging from 0.03  $\mu$ M to 5.9  $\mu$ M for compound **6**, while compound **7** recorded GI<sub>50</sub> values between 0.18 – 1.53  $\mu$ M. Thus, these two compounds were further assessed in detail in order to identify a possible antiproliferative mechanism of action. DAPI staining revealed that both compounds induced nuclei condensation and overall cell morphological changes consistent with apoptotic cell death. rtPCR analysis showed that both compounds induced up-regulation of pro-apoptotic Bak and Bad genes while down-regulating Bcl-XL and Bcl-2 anti-apoptotic genes. Molecular docking analysis revealed that both compounds exhibited high scores for Bcl-XL inhibition, while compound **7** showed higher *in silico* Bcl-XL inhibition potential as compare to the native inhibitor ATB-737; suggesting that compounds may induce apoptotic cell death through targeted anti-apoptotic protein inhibition, as well.

**Keywords:** pentacyclic triterpenes, platanoate, ursane, Claisen–Schmidt reaction, NCI-60, anticancer activity, apoptosis, antiangiogenic, molecular docking

## Table of content

|                                                                                                                                                                           |    |
|---------------------------------------------------------------------------------------------------------------------------------------------------------------------------|----|
| <b>Figure S1.</b> NMR spectra of compound <b>4</b>                                                                                                                        | 3  |
| <b>Figure S2.</b> NMR spectra of compound <b>5</b>                                                                                                                        | 6  |
| <b>Figure S3.</b> NMR spectra of compound <b>6</b>                                                                                                                        | 7  |
| <b>Figure S4.</b> NMR spectra of compound <b>7</b>                                                                                                                        | 10 |
| <b>Figure S5.</b> NMR spectra of compound <b>8</b>                                                                                                                        | 13 |
| <b>Figure S6.</b> <i>In vitro</i> antitumor activity of compound <b>1</b> against human cancer cells of 60 lines at a concentration of 100 $\mu$ M                        | 14 |
| <b>Figure S7.</b> <i>In vitro</i> antitumor activity of compound <b>2</b> against human cancer cells of 60 lines at a concentration of 100 $\mu$ M                        | 15 |
| <b>Figure S8.</b> <i>In vitro</i> antitumor activity of compound <b>4</b> against human cancer cells of 60 lines at a concentration of 100 $\mu$ M                        | 16 |
| <b>Figure S9.</b> <i>In vitro</i> antitumor activity of compound <b>5</b> against human cancer cells of 60 lines at a concentration of 100 $\mu$ M                        | 17 |
| <b>Figure S10.</b> <i>In vitro</i> antitumor activity of compound <b>6</b> against human cancer cells of 60 lines at a concentration of 100 $\mu$ M                       | 18 |
| <b>Figure S11.</b> <i>In vitro</i> antitumor activity of compound <b>7</b> against human cancer cells of 60 lines at a concentration of 100 $\mu$ M                       | 19 |
| <b>Figure S12.</b> <i>In vitro</i> antitumor activity of compound <b>8</b> against human cancer cells of 60 lines at a concentration of 100 $\mu$ M                       | 20 |
| <b>Figure S13.</b> <i>In vitro</i> anticancer activity of compound <b>6</b> against 60 human cancer cell lines in second stage in single concentration 0.01 – 100 $\mu$ M | 21 |
| <b>Figure S14.</b> <i>In vitro</i> anticancer activity of compound <b>7</b> against 60 human cancer cell lines in second stage in single concentration 0.01 – 100 $\mu$ M | 24 |

**Figure S1.** NMR spectra of compound **4**

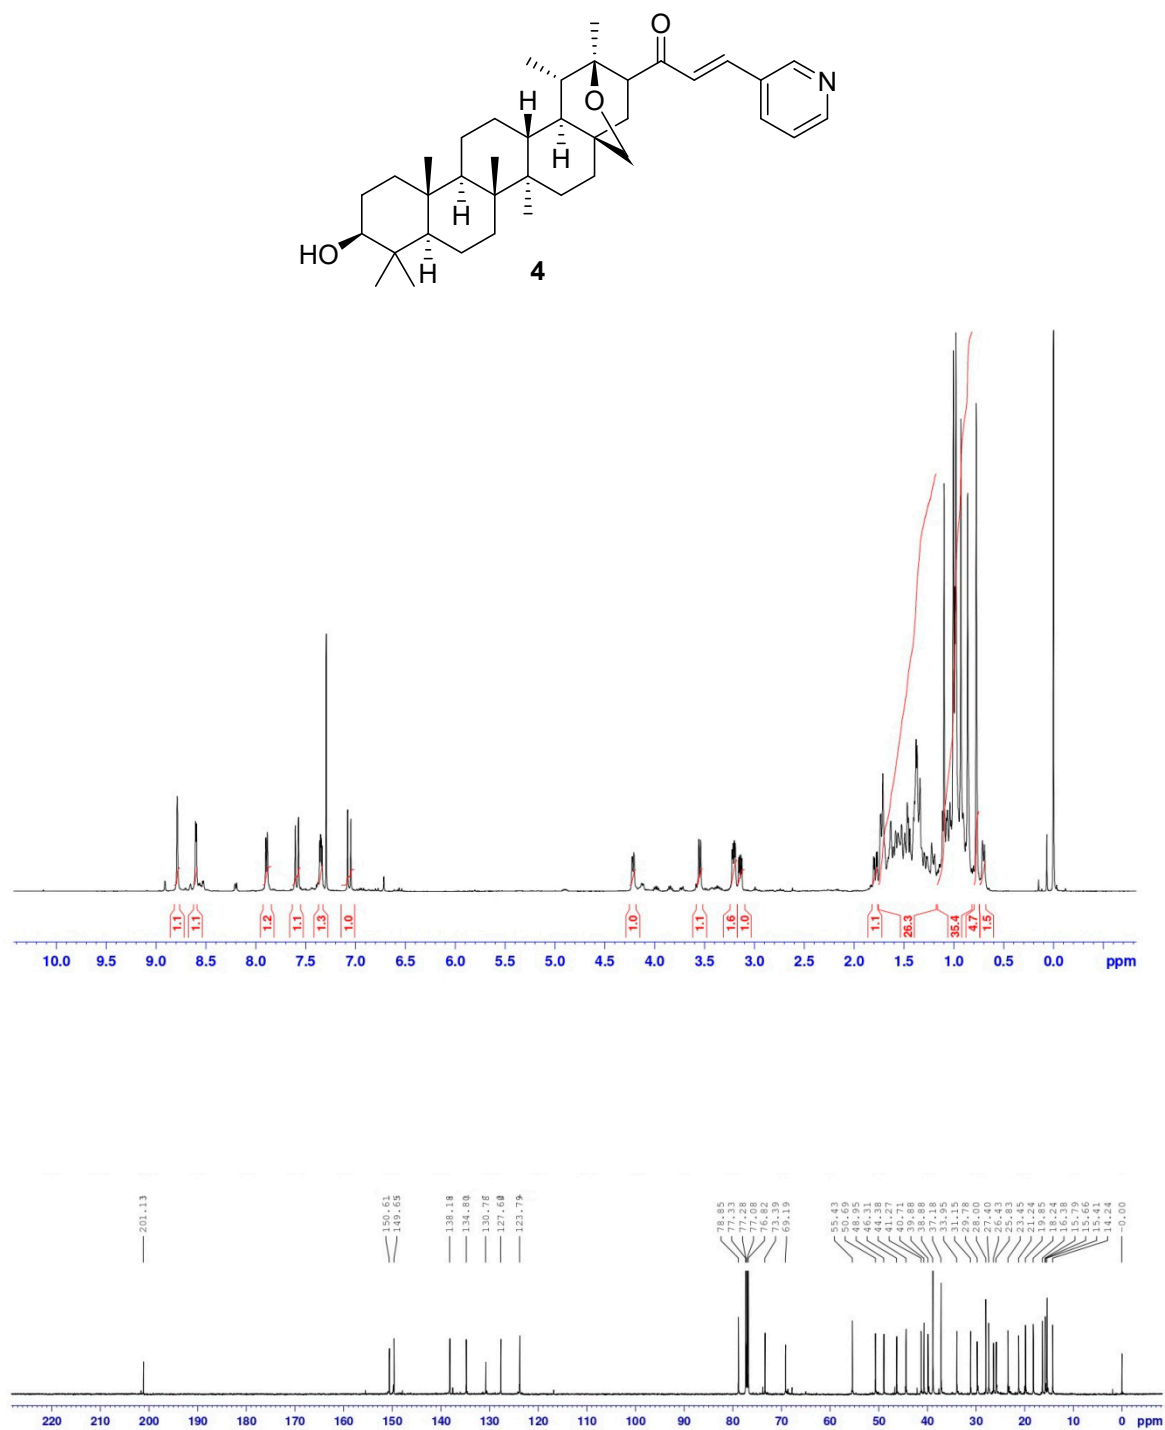

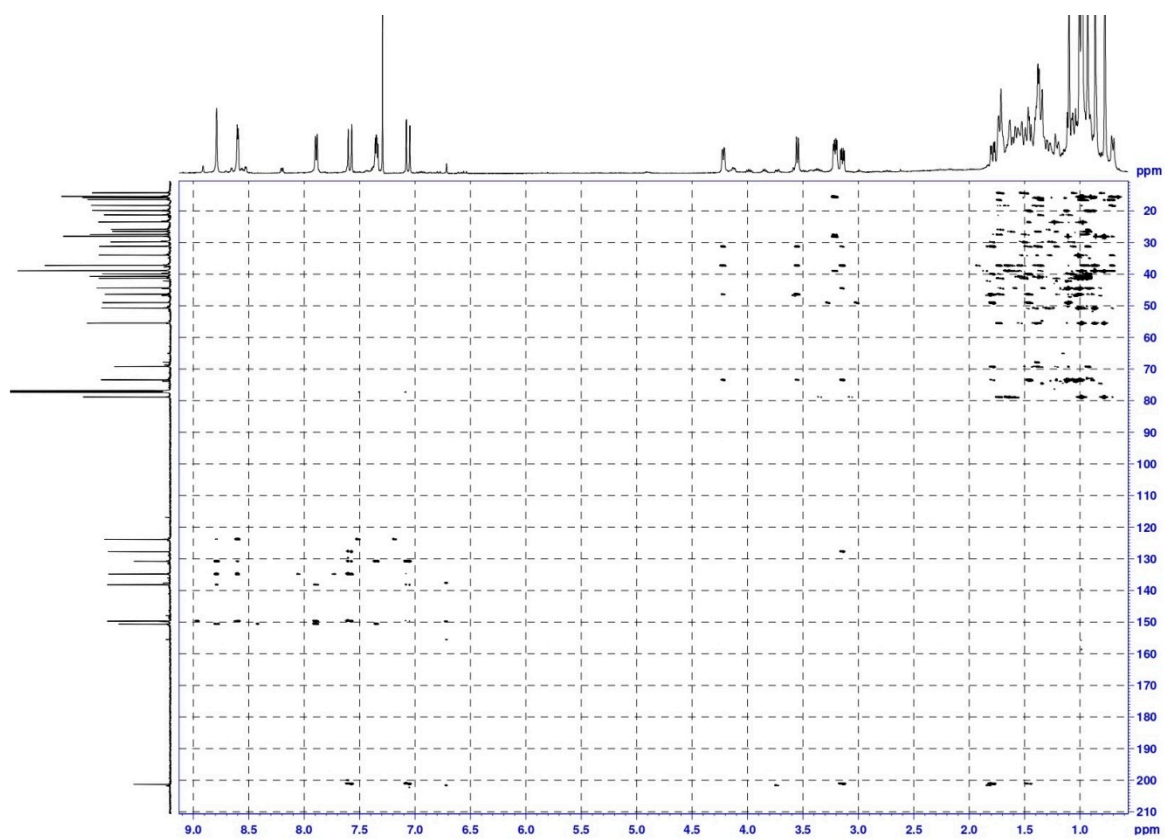

HMBC spectrum of compound 4

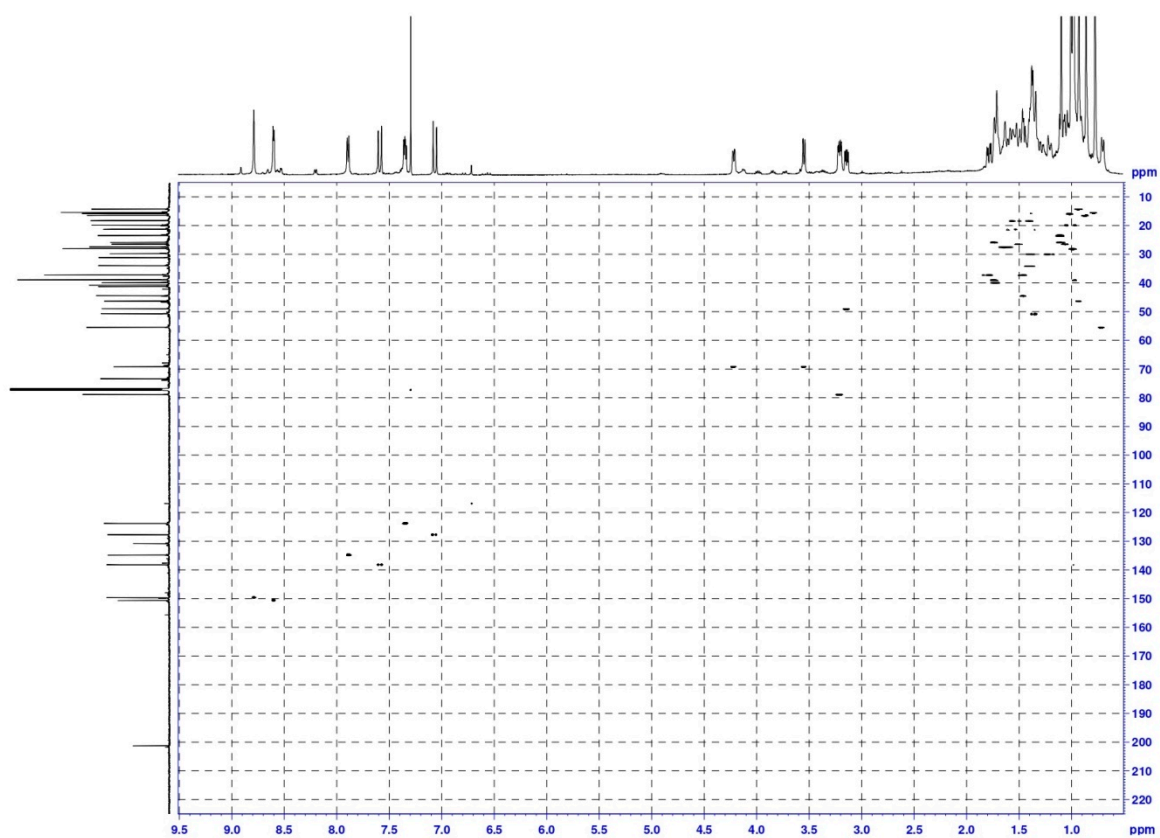

HSQC spectrum of compound 4



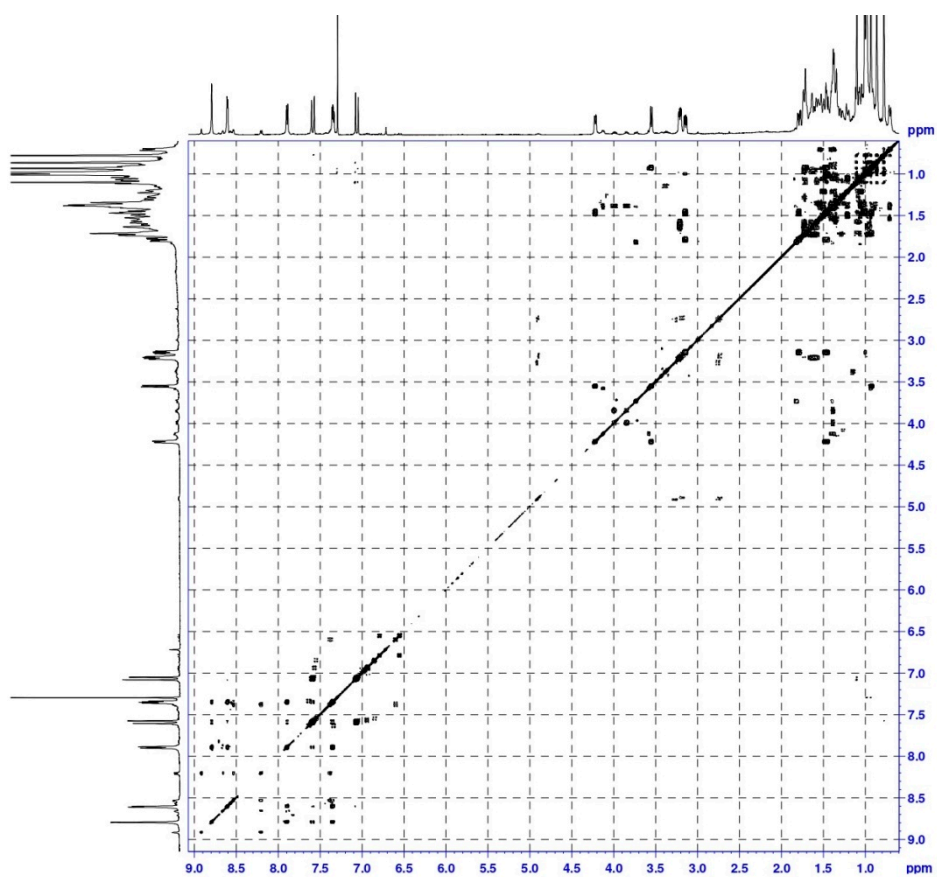

COSY spectrum of compound 4

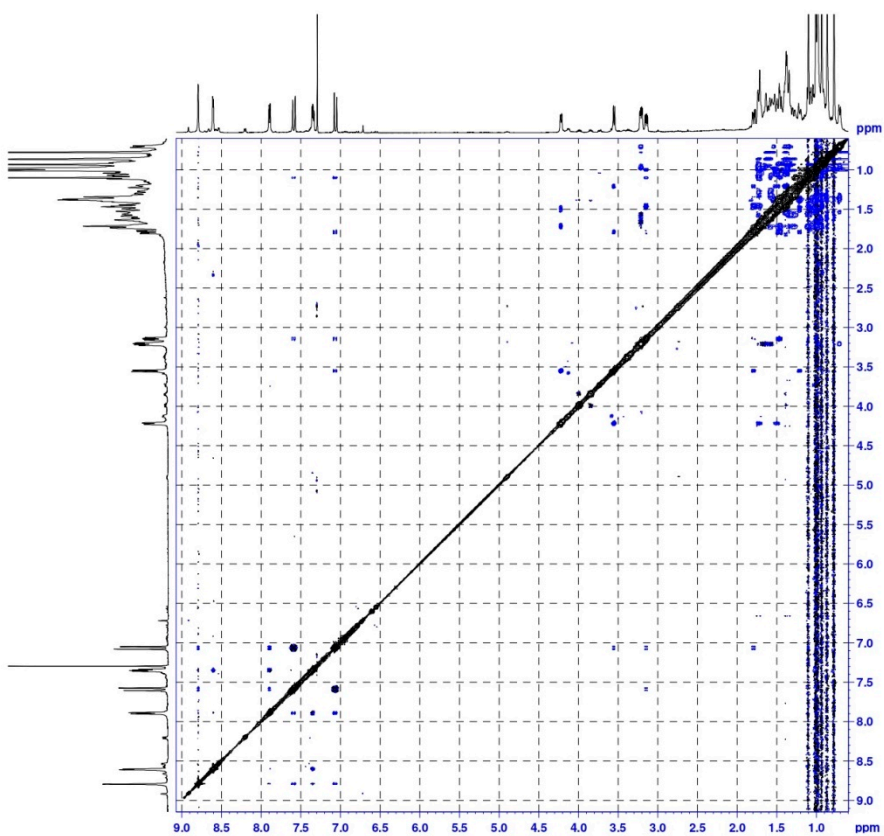

NOESY spectrum of compound 4

**Figure S2.** NMR spectra of compound **5**

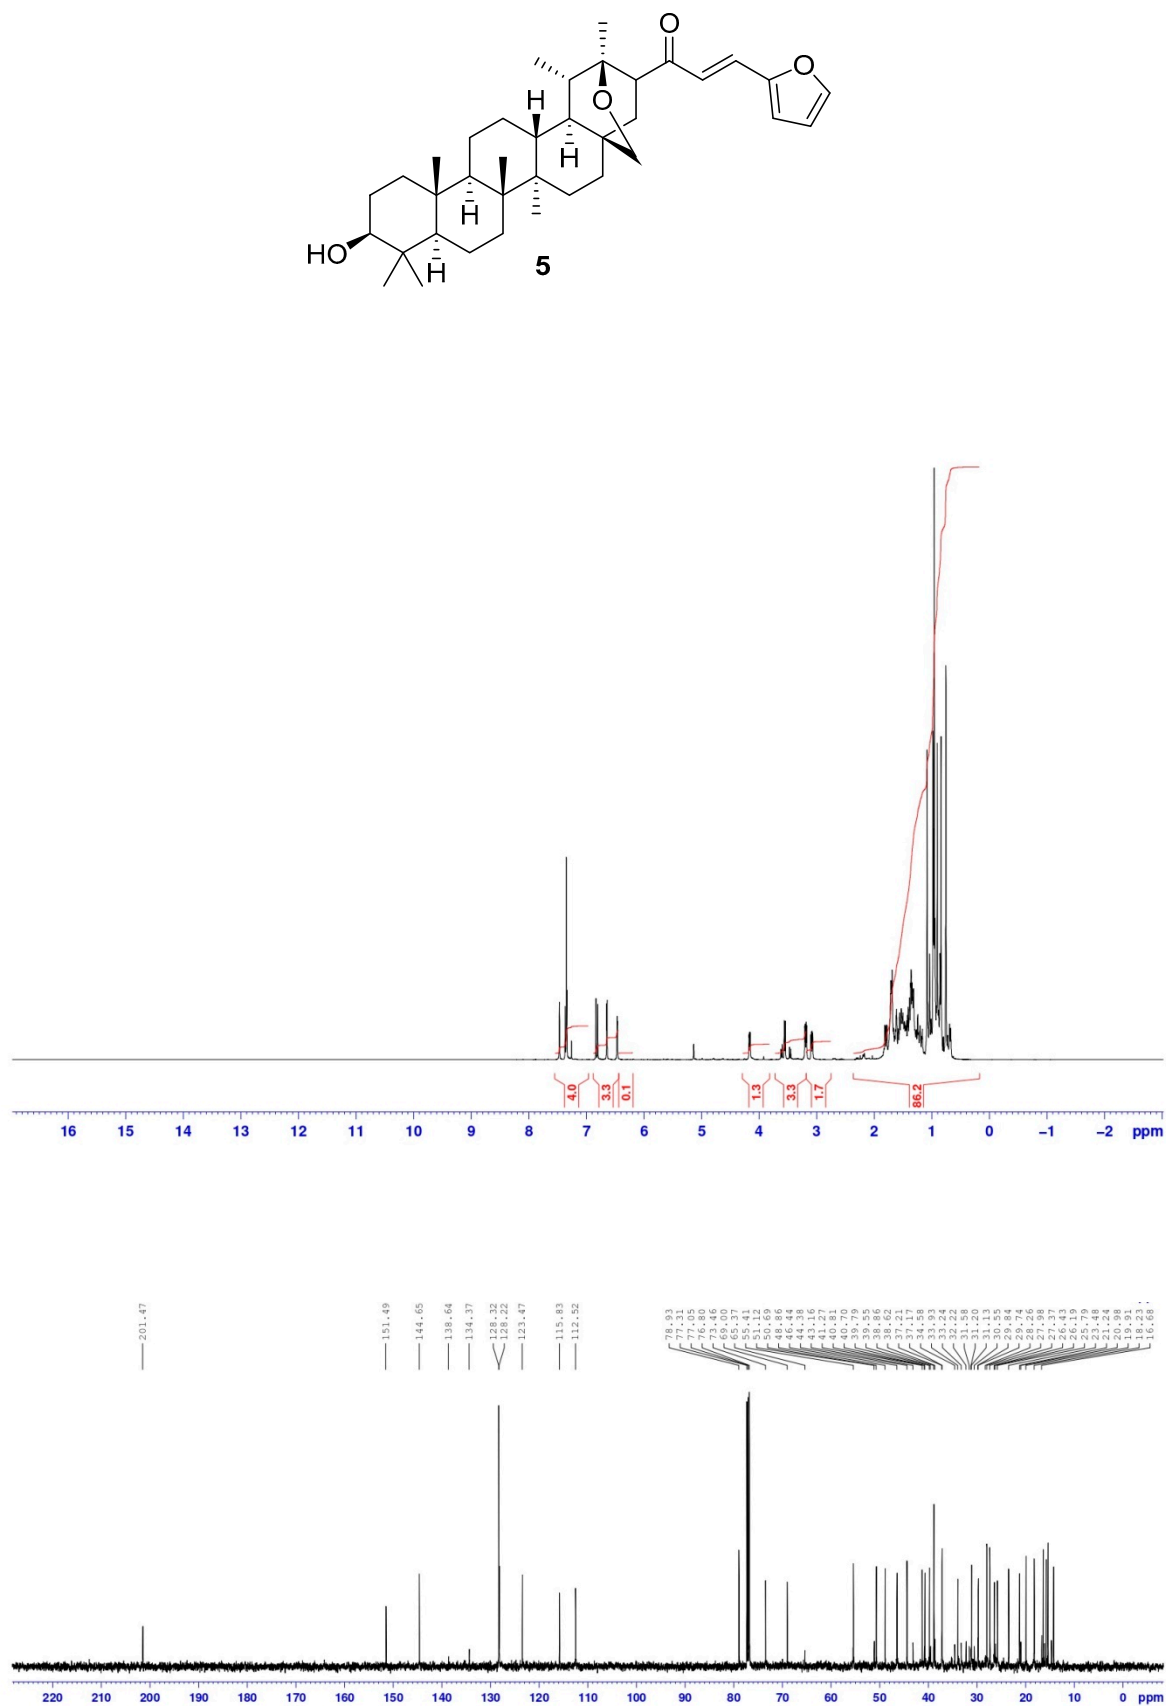

**Figure S3.** NMR spectra of compound **6**

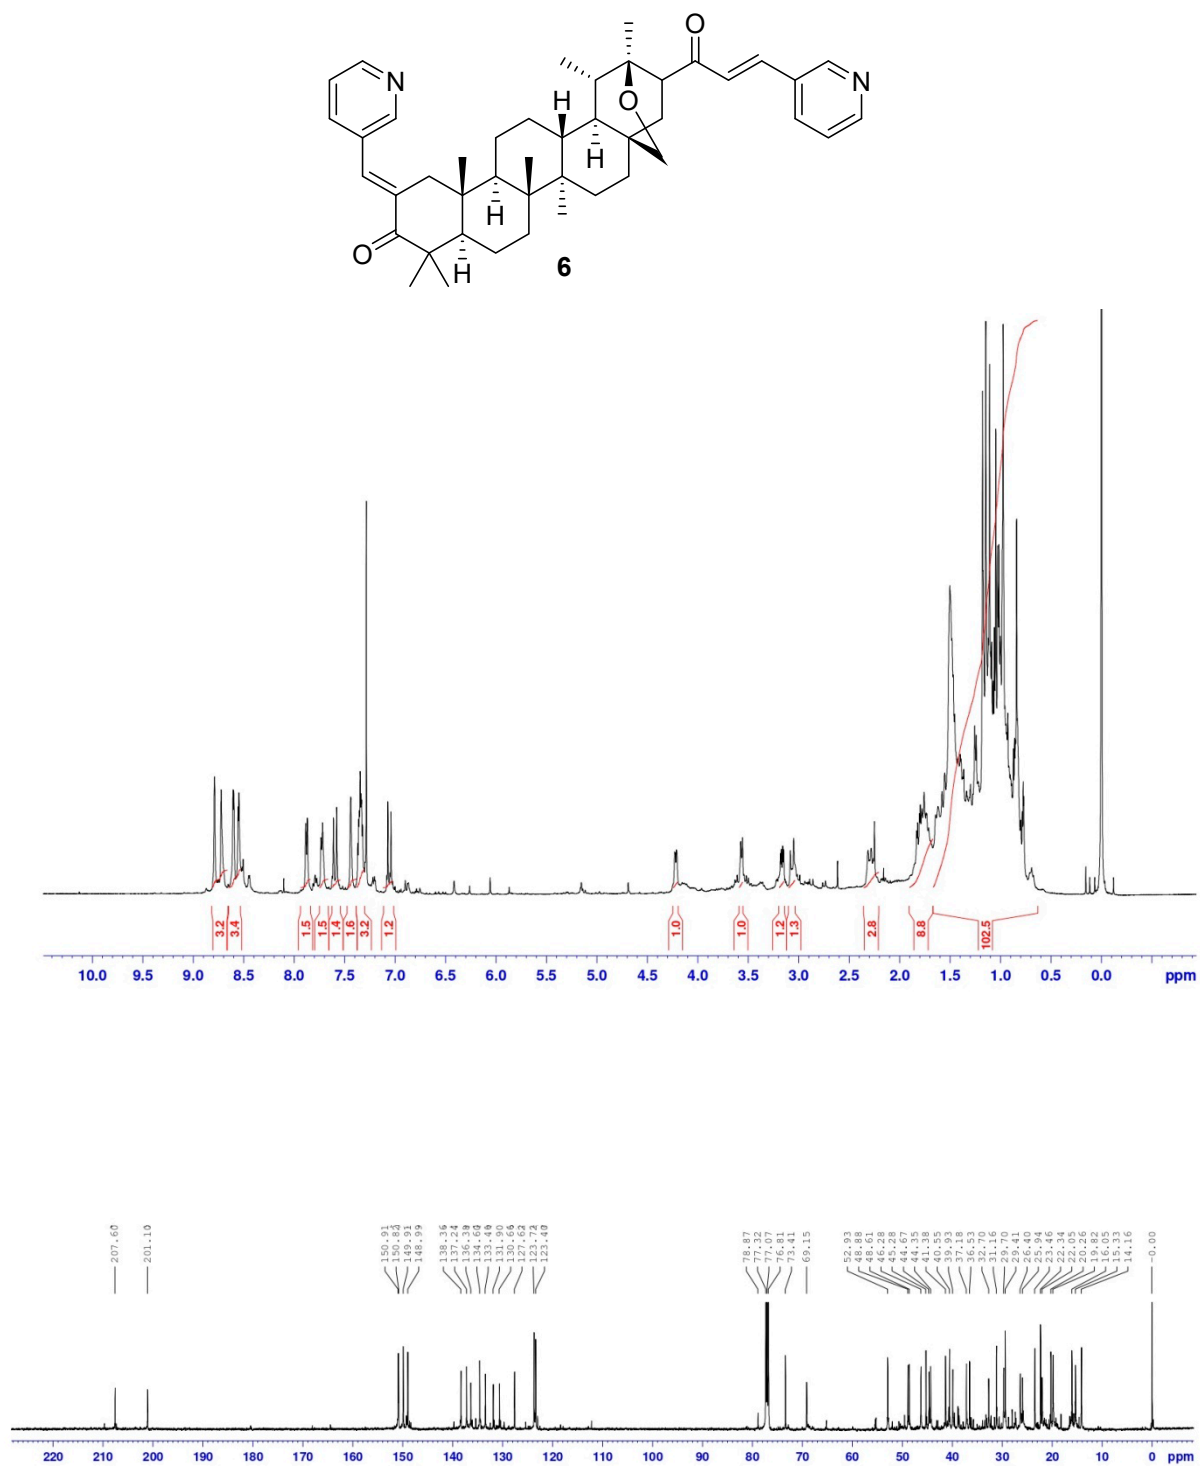

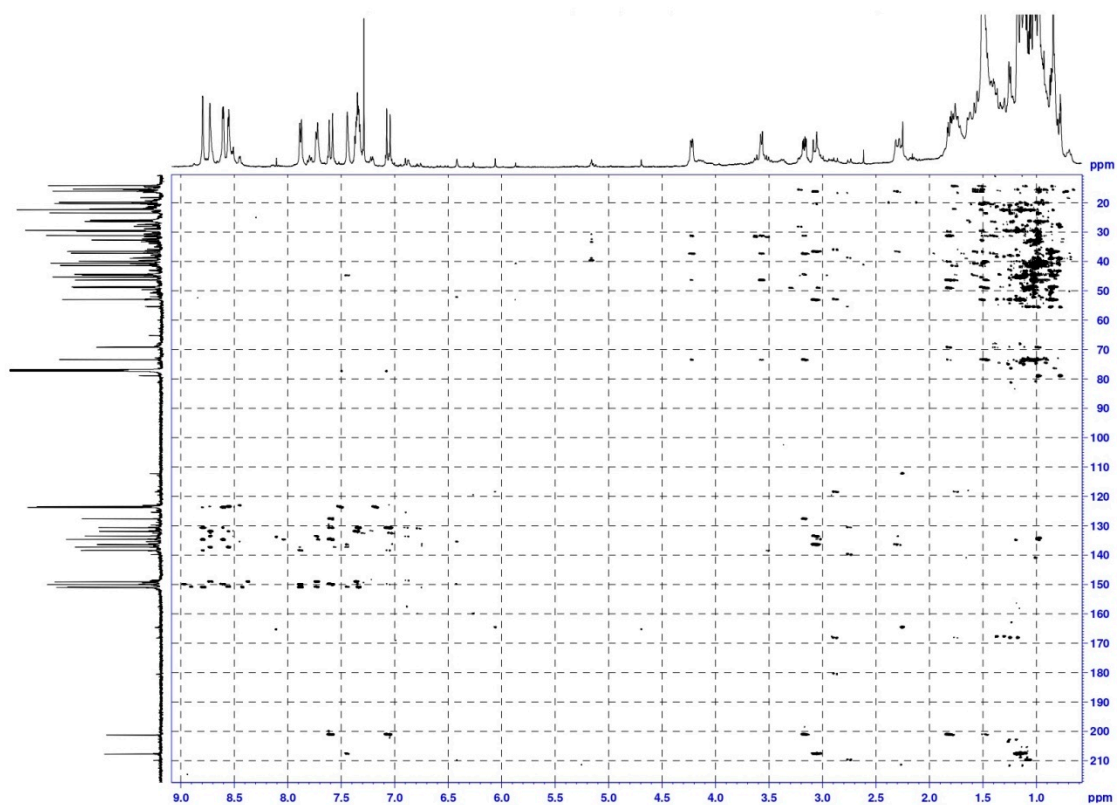

HMBC spectrum of compound 6

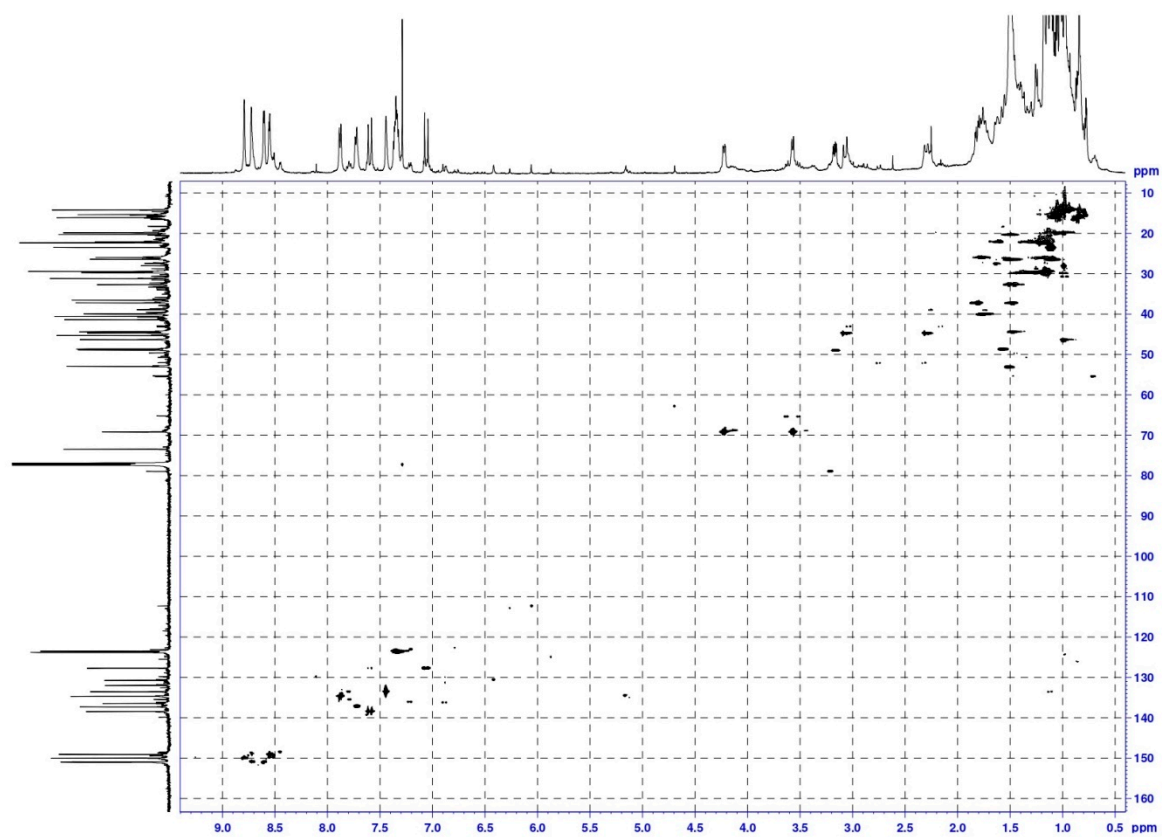

HSQC spectrum of compound 6

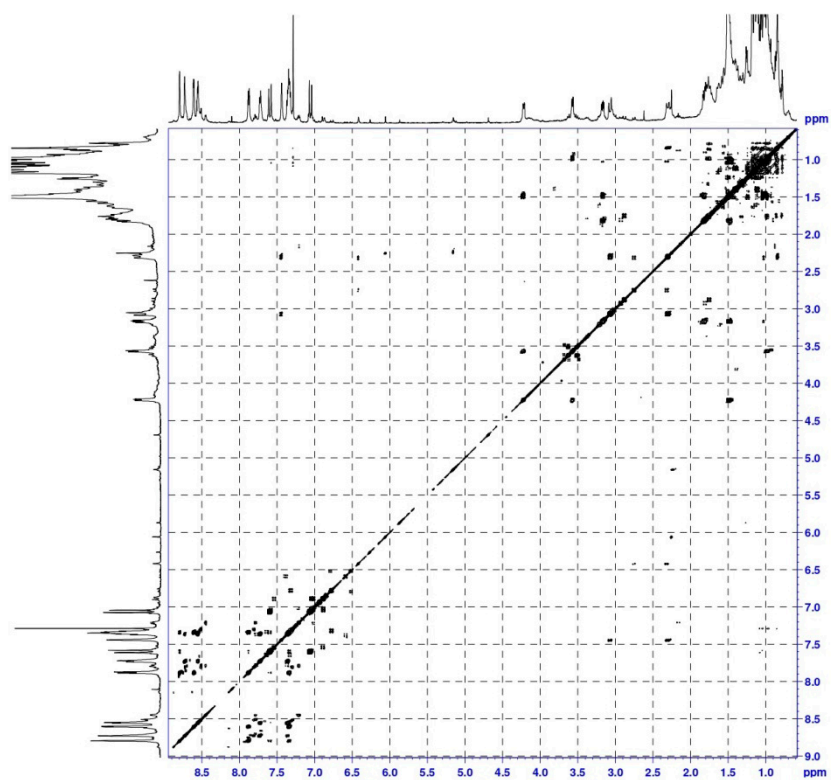

COSY spectrum of compound **6**

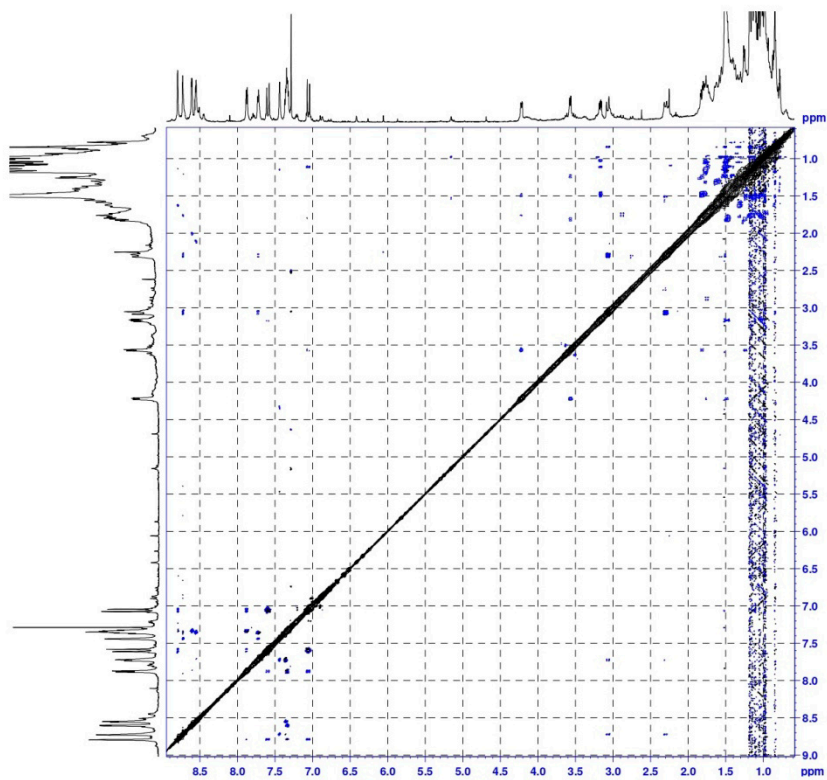

NOESY spectrum of compound **6**

**Figure S4.** NMR spectra of compound **7**

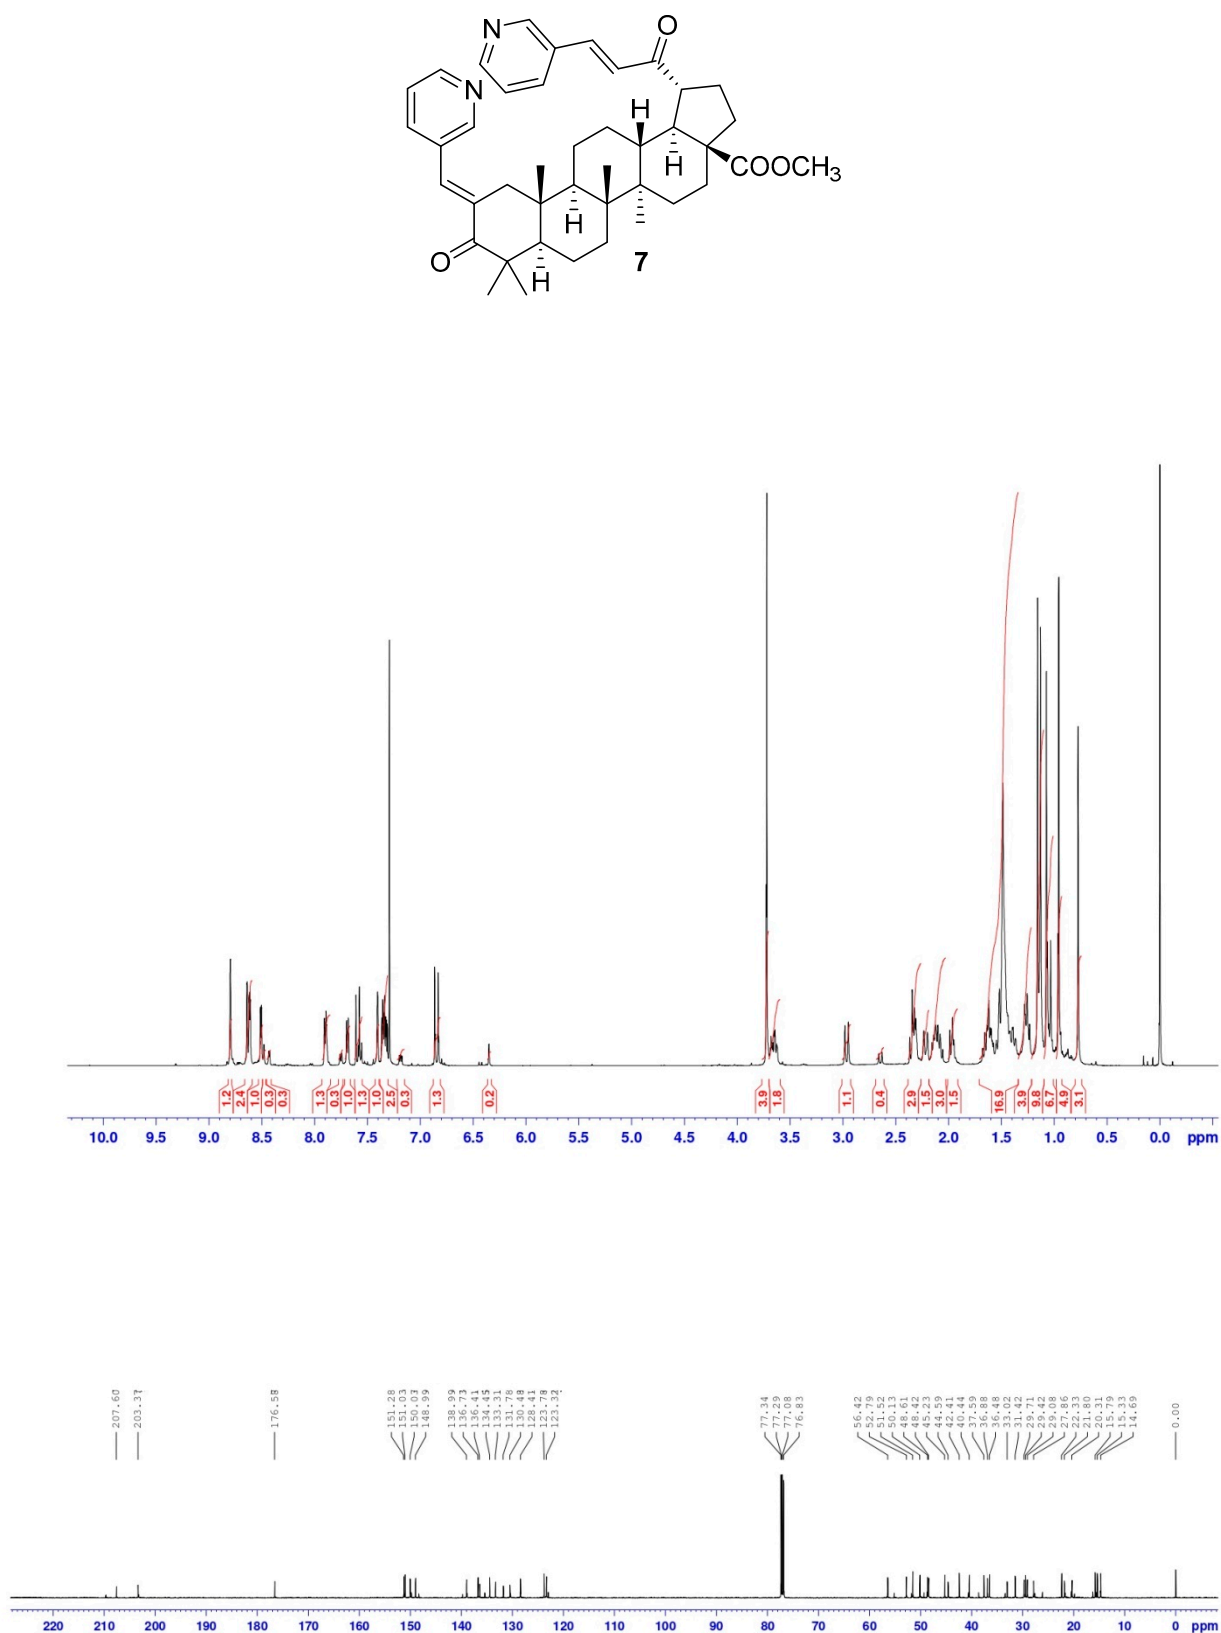



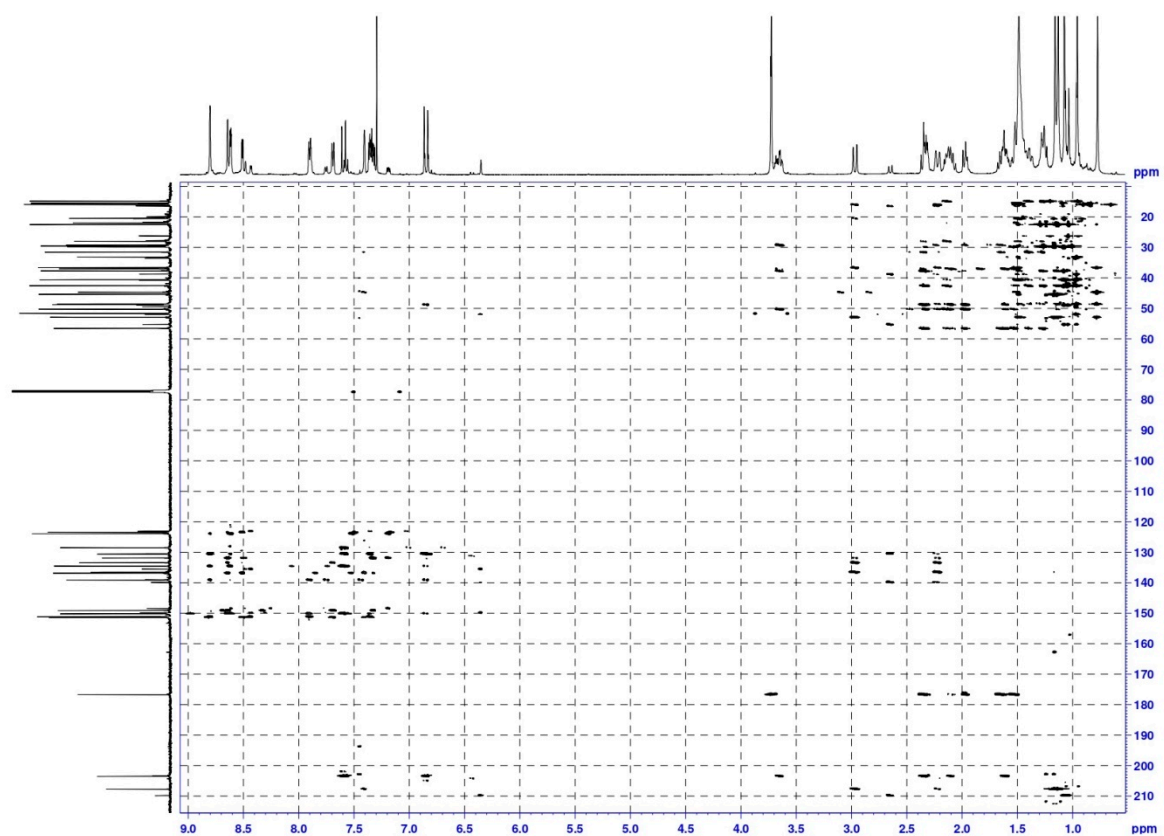

HMBC spectrum of compound **7**

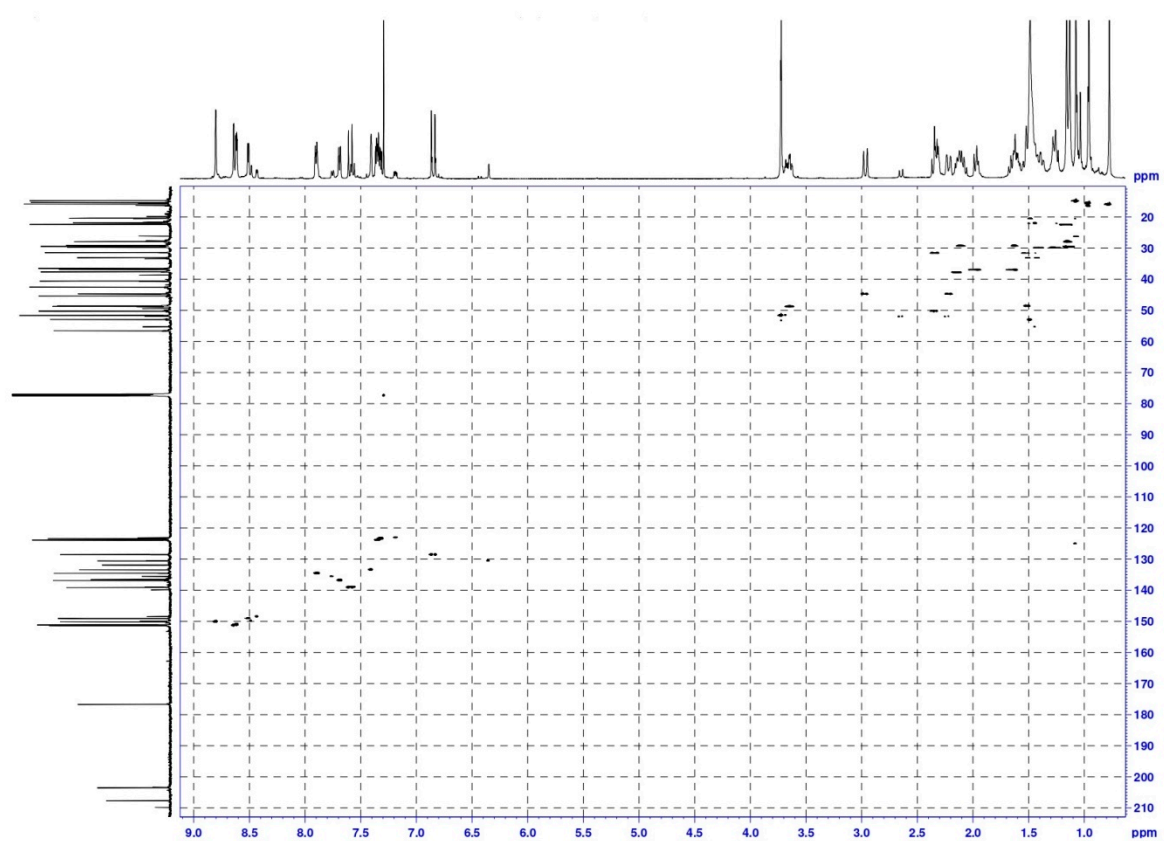

HSQC spectrum of compound **7**

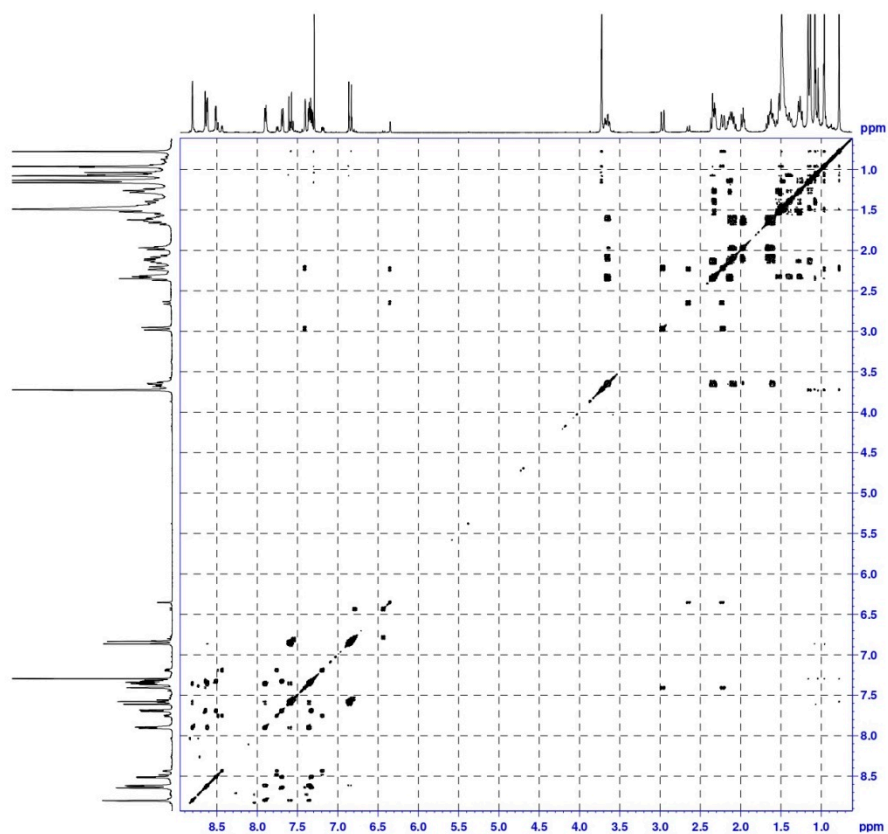

COSY spectrum of compound 7

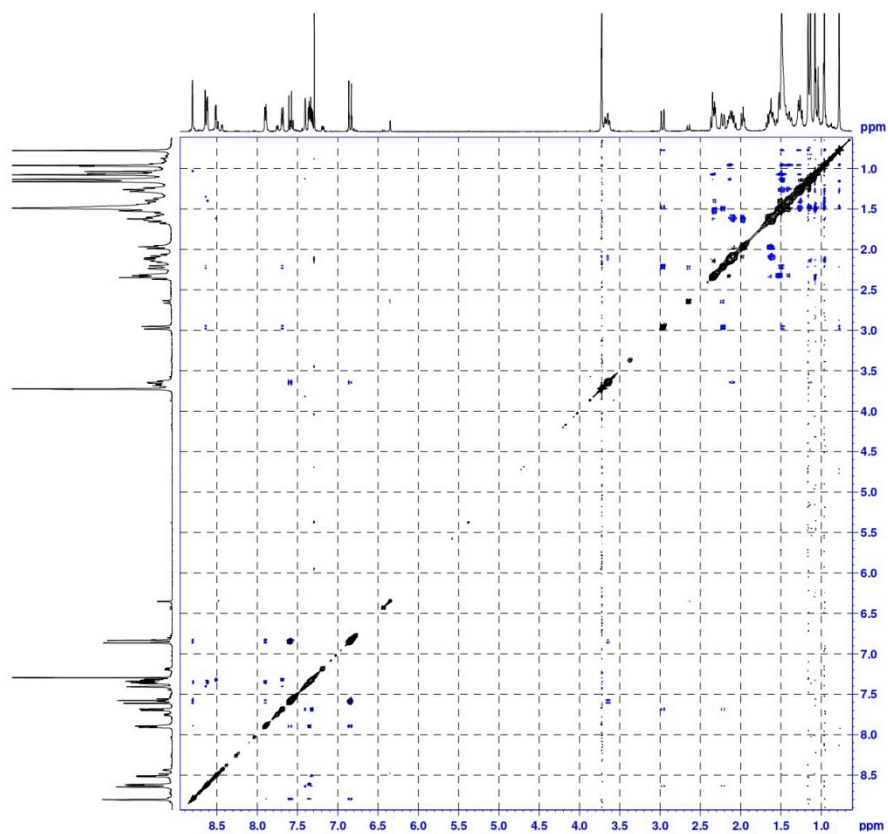

NOESY spectrum of compound 7



**Figure S5.** NMR spectra of compound **8**

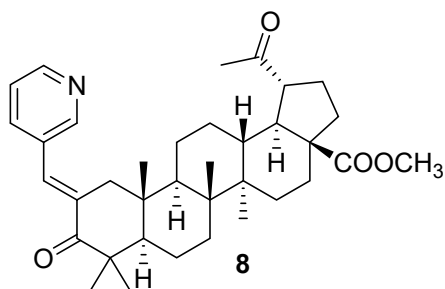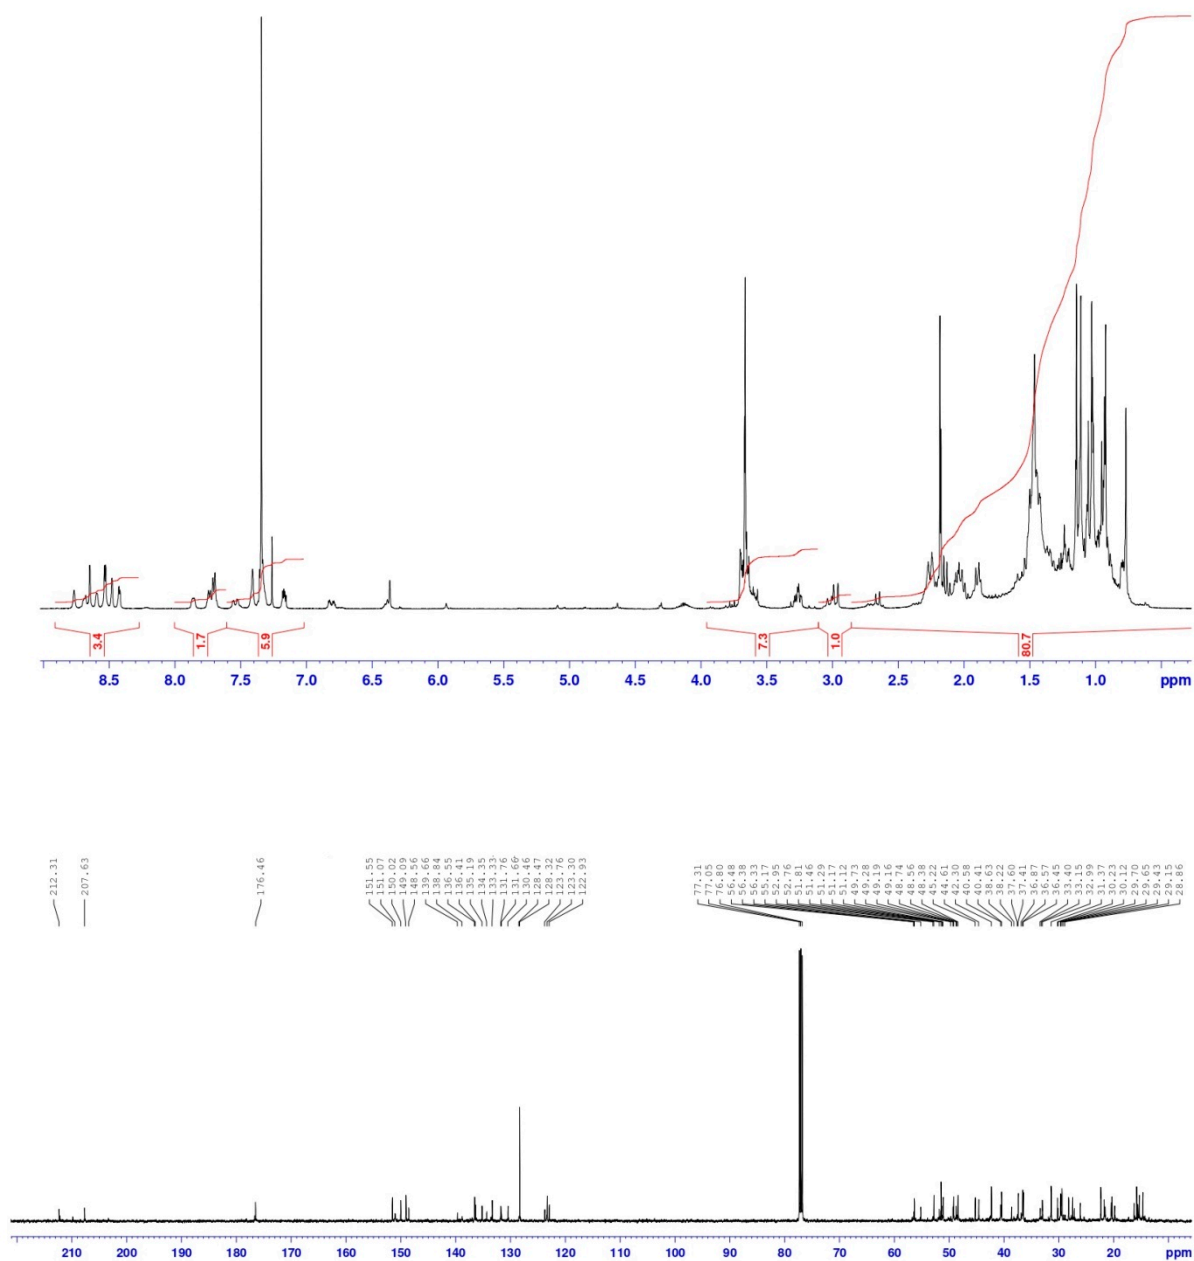

**Figure S6.** *In vitro* antitumor activity of compound **1** against human cancer cells of 60 lines at a concentration of 100  $\mu$ M

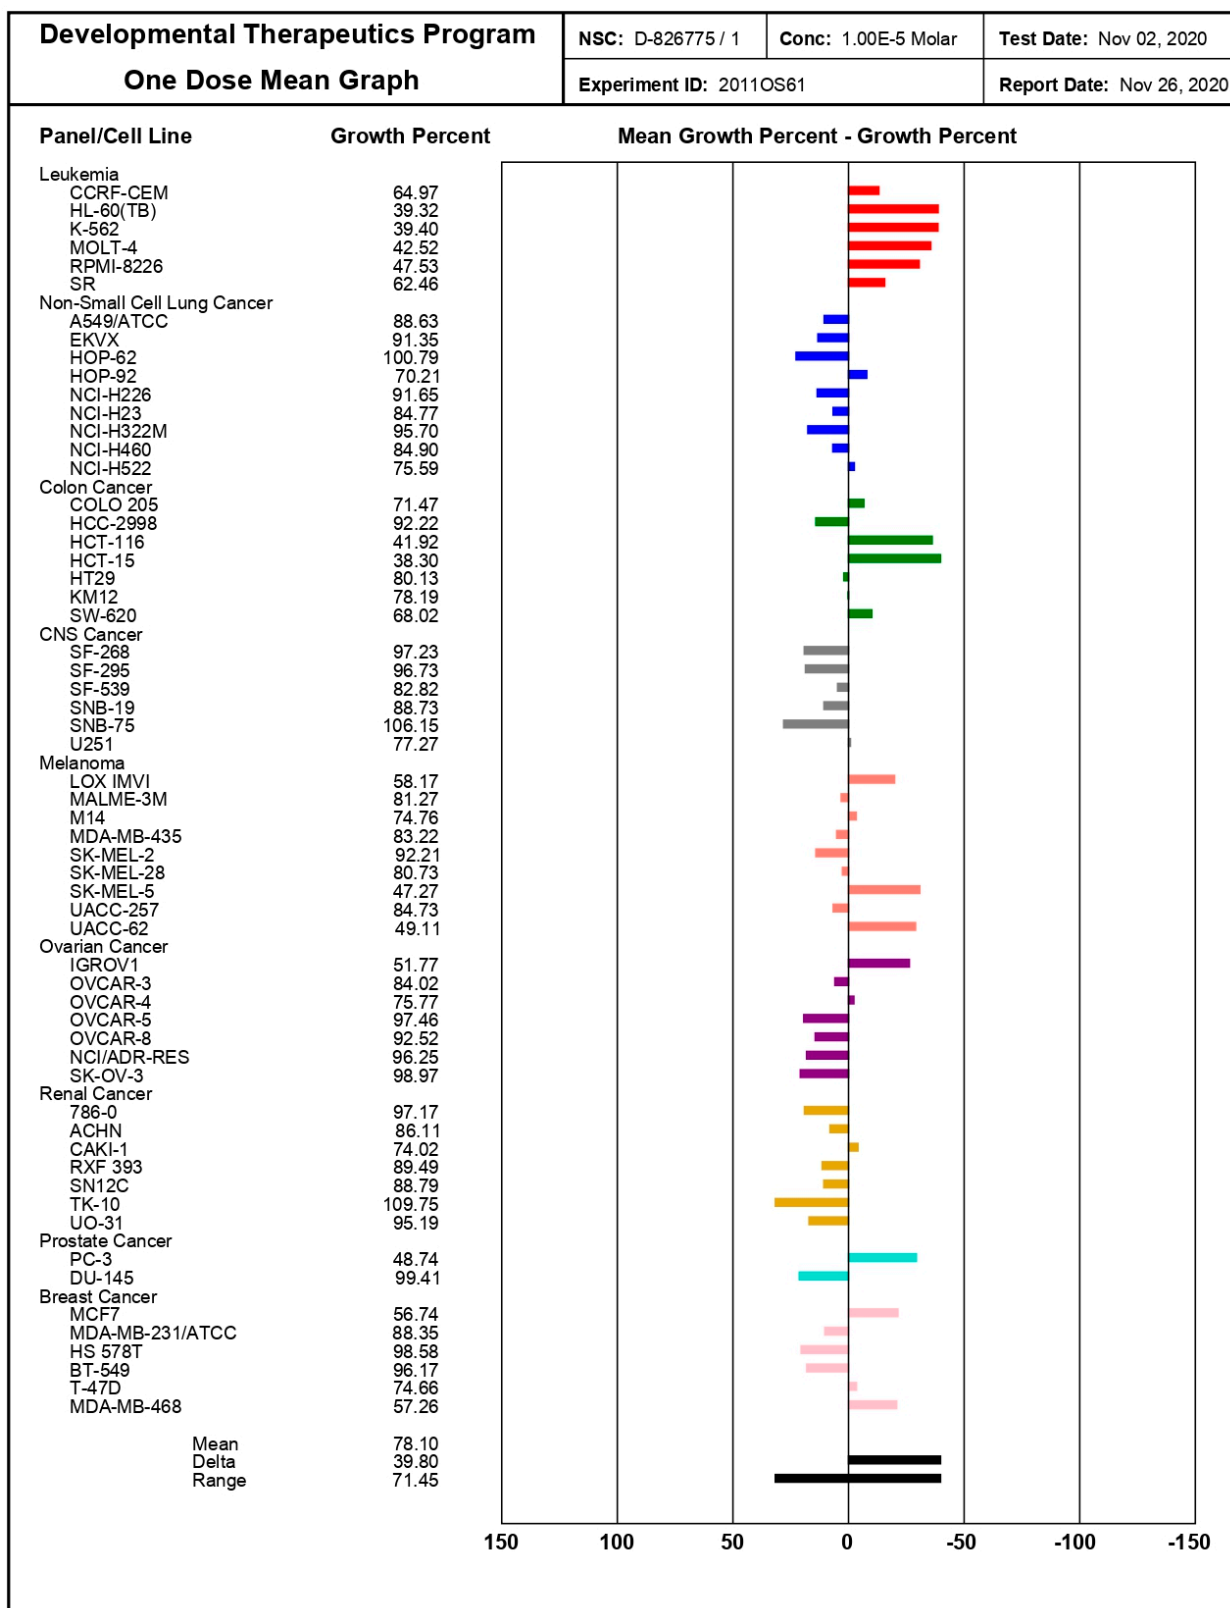

**Figure S7.** *In vitro* antitumor activity of compound **2** against human cancer cells of 60 lines at a concentration of 100  $\mu$ M

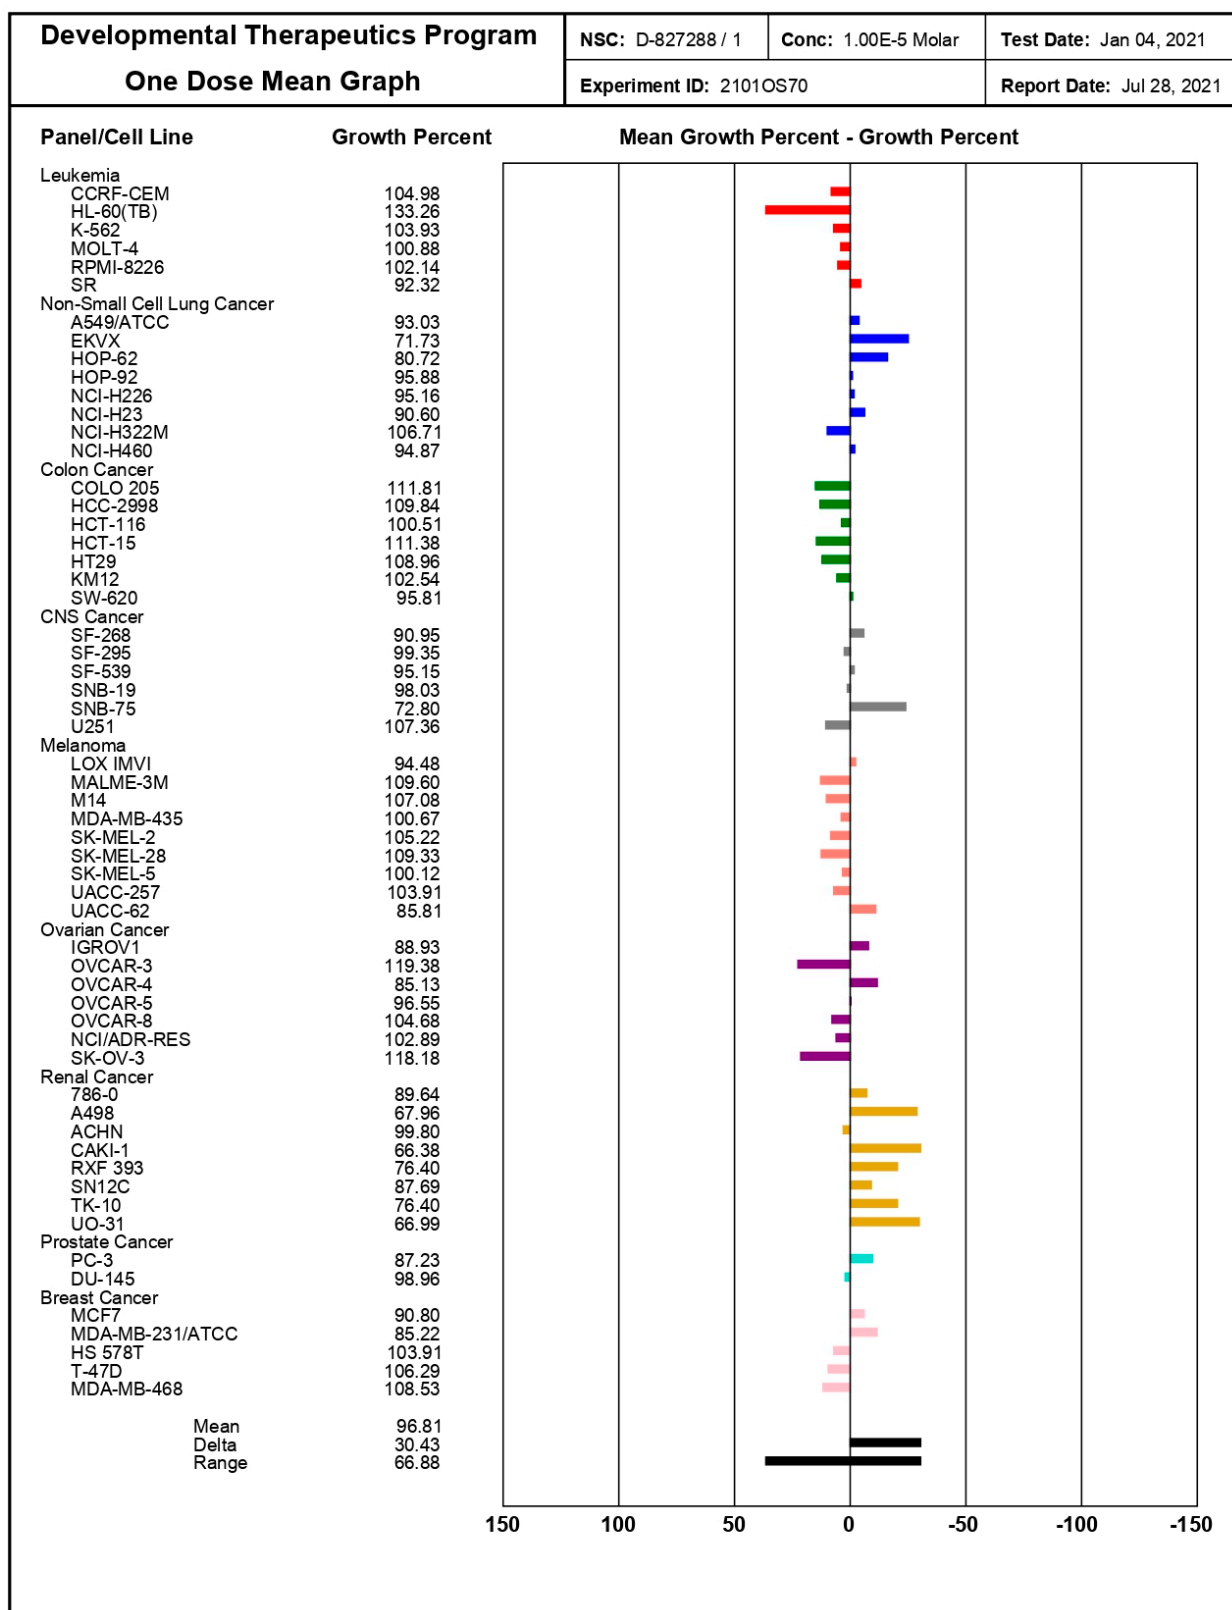

**Figure S8.** *In vitro* antitumor activity of compound **4** against human cancer cells of 60 lines at a concentration of 100  $\mu$ M

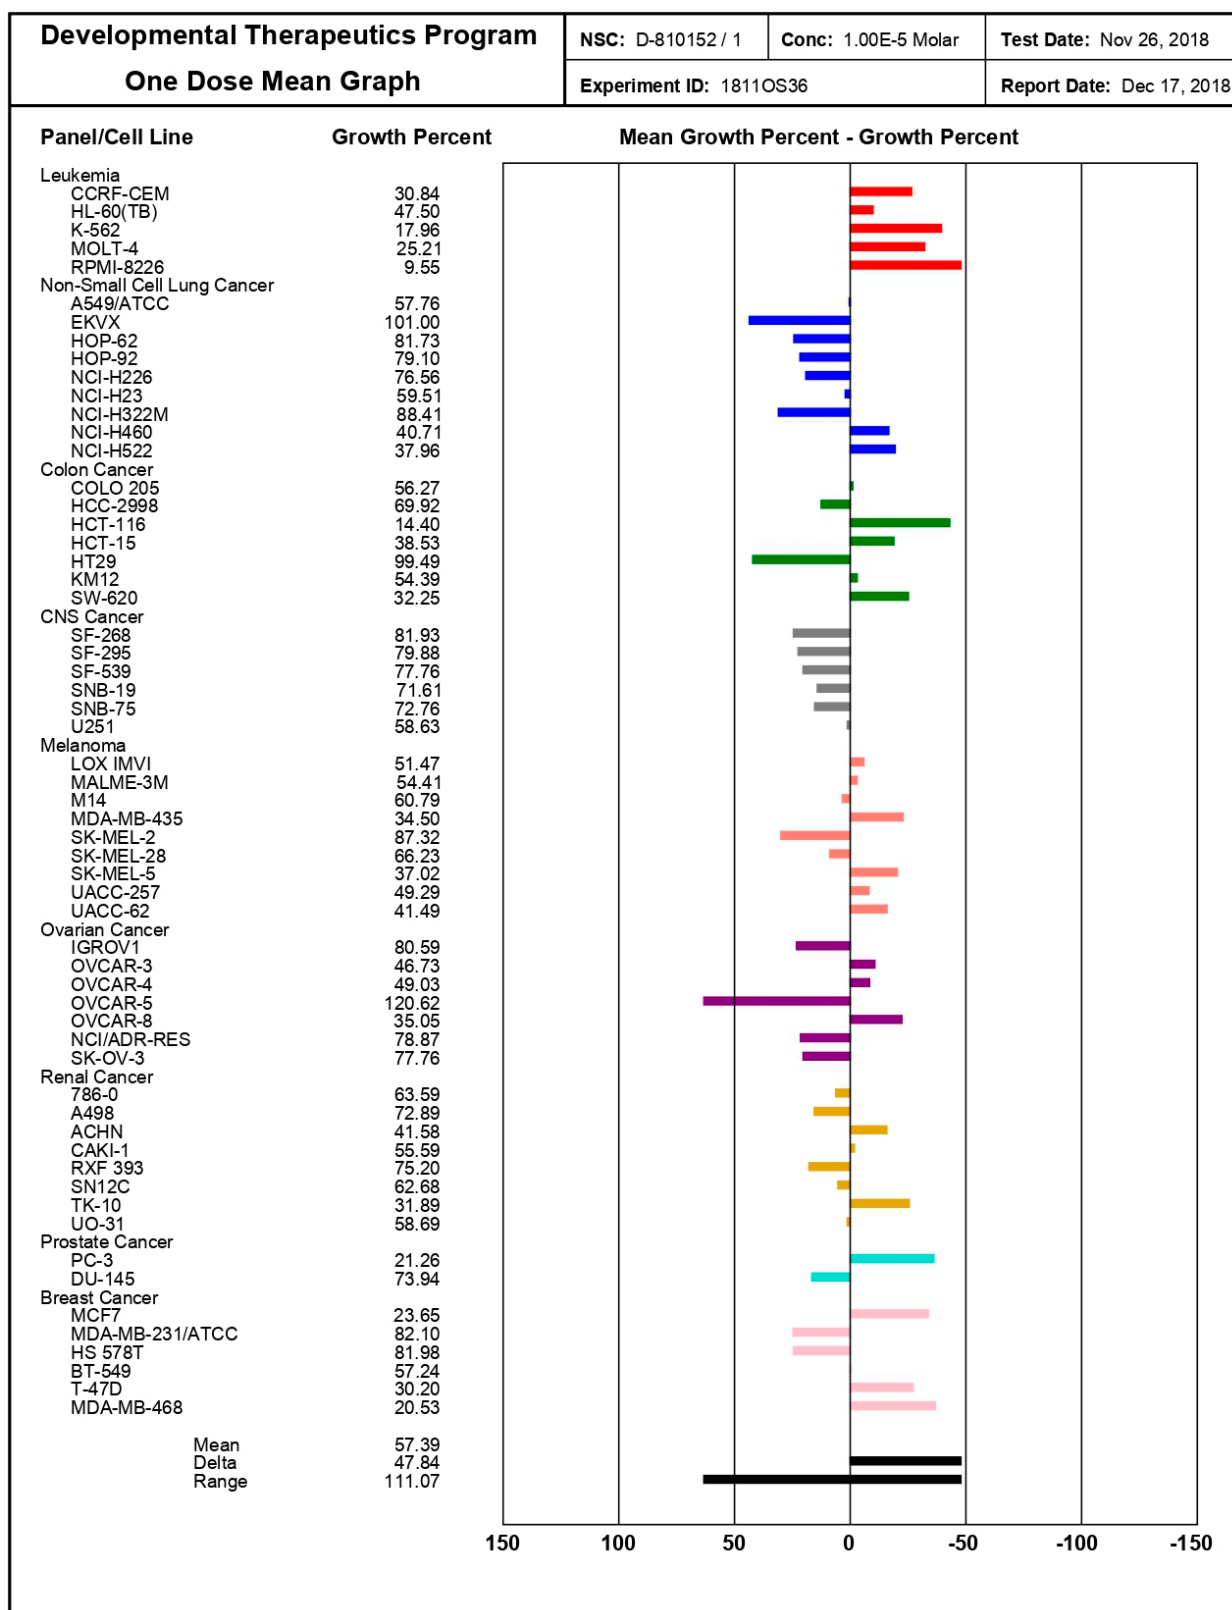

**Figure S9.** *In vitro* antitumor activity of compound **5** against human cancer cells of 60 lines at a concentration of 100  $\mu$ M

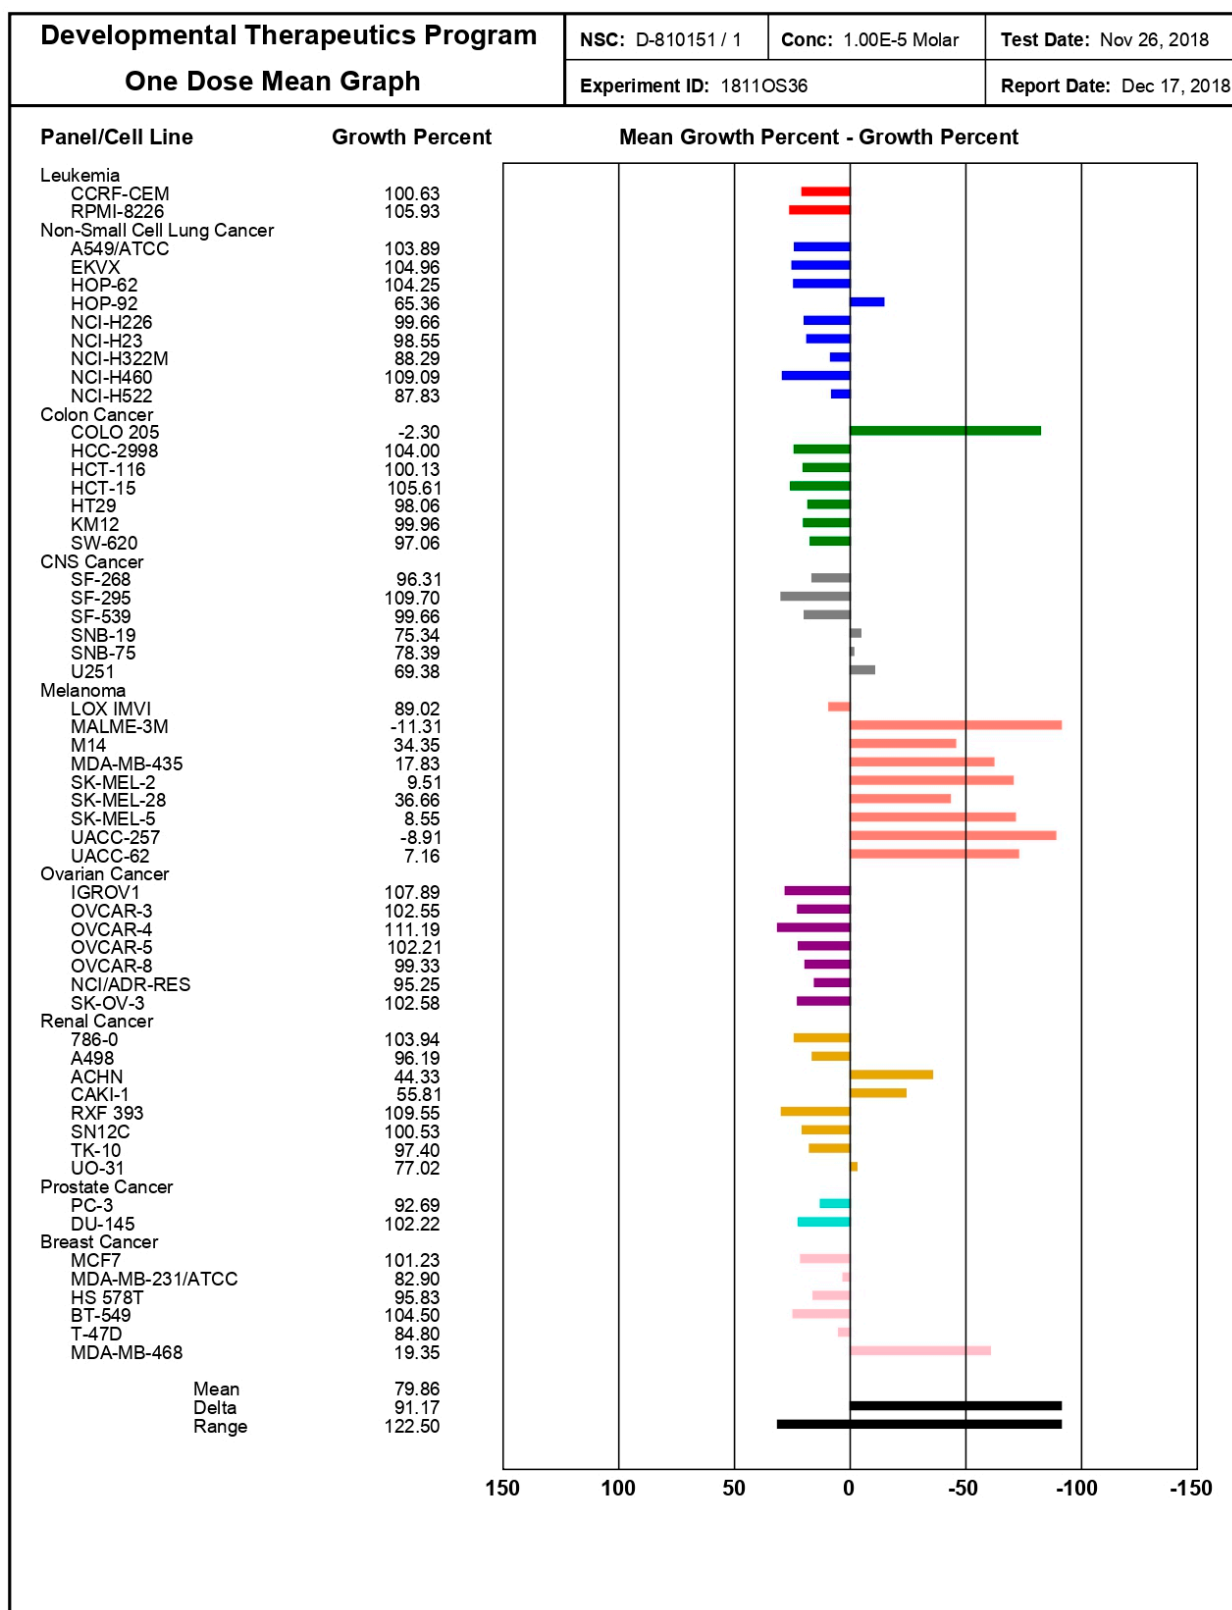

**Figure S10.** *In vitro* antitumor activity of compound **6** against human cancer cells of 60 lines at a concentration of 100  $\mu$ M

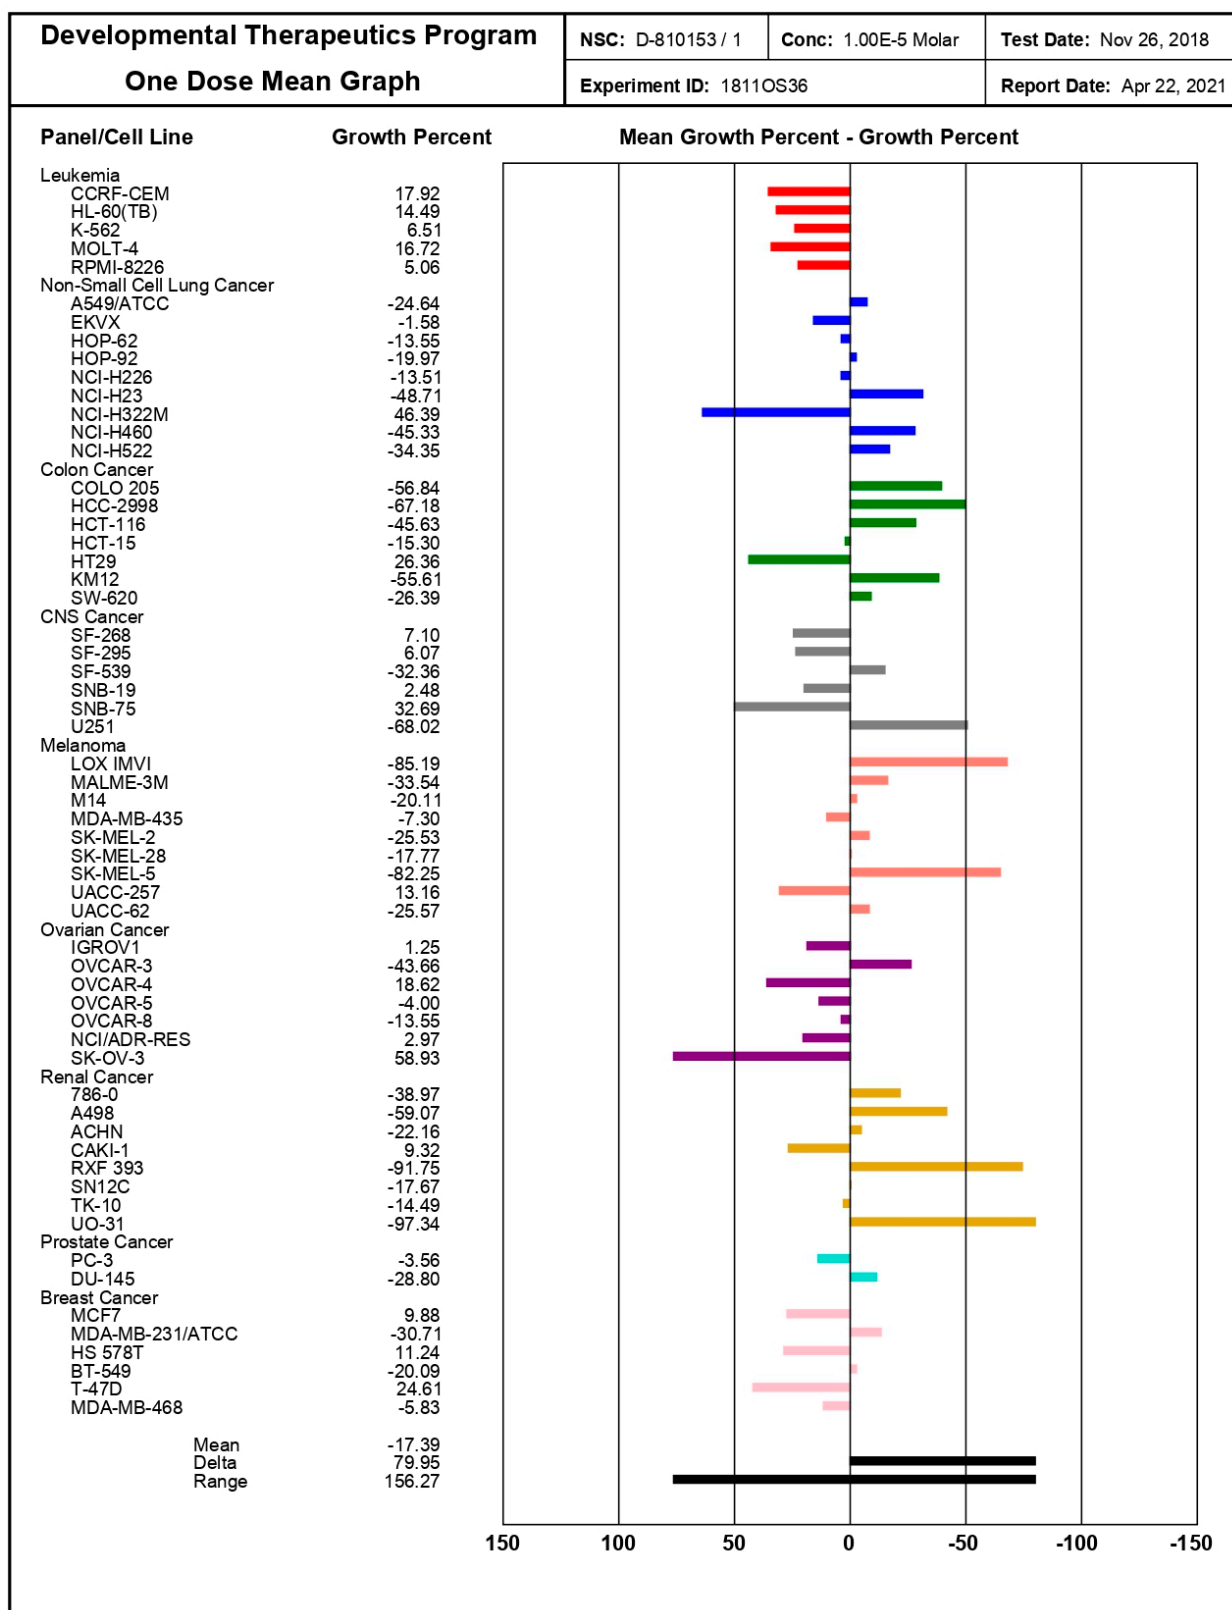

**Figure S11.** *In vitro* antitumor activity of compound **7** against human cancer cells of 60 lines at a concentration of 100  $\mu$ M

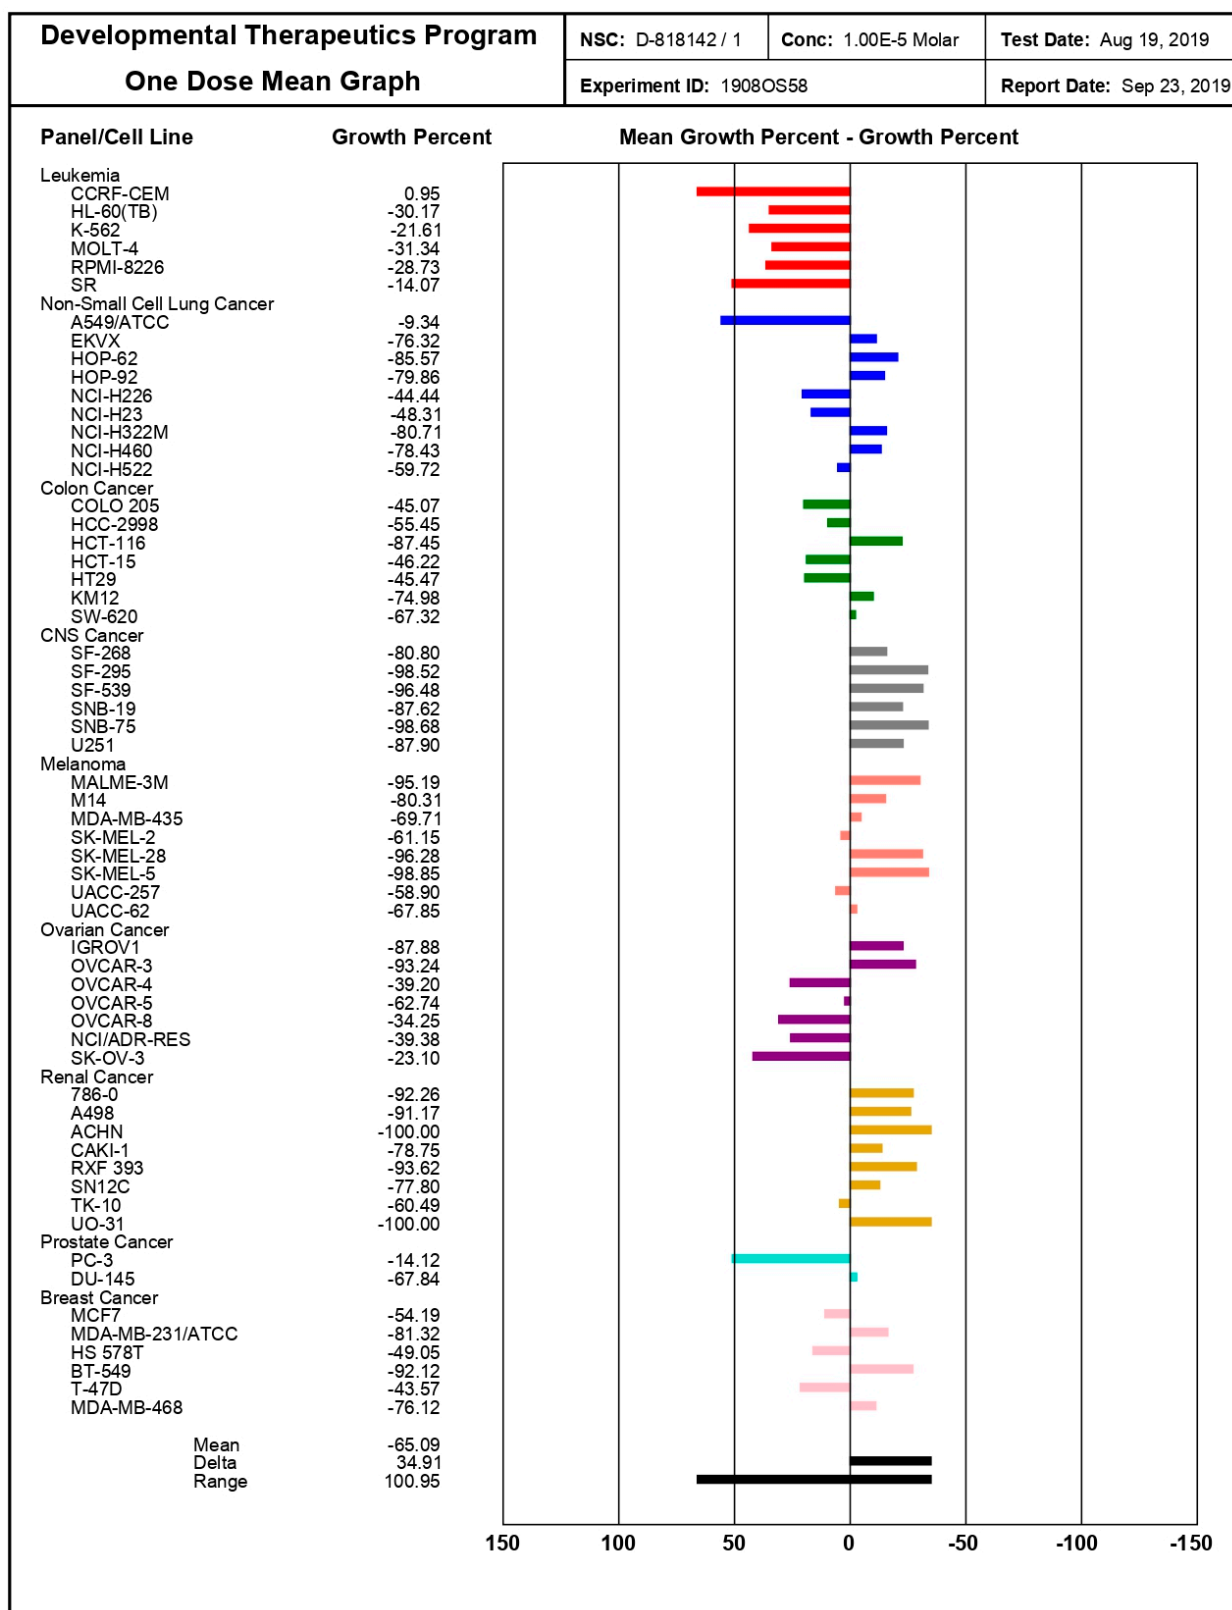

**Figure S12.** *In vitro* antitumor activity of compound **8** against human cancer cells of 60 lines at a concentration of 100  $\mu$ M

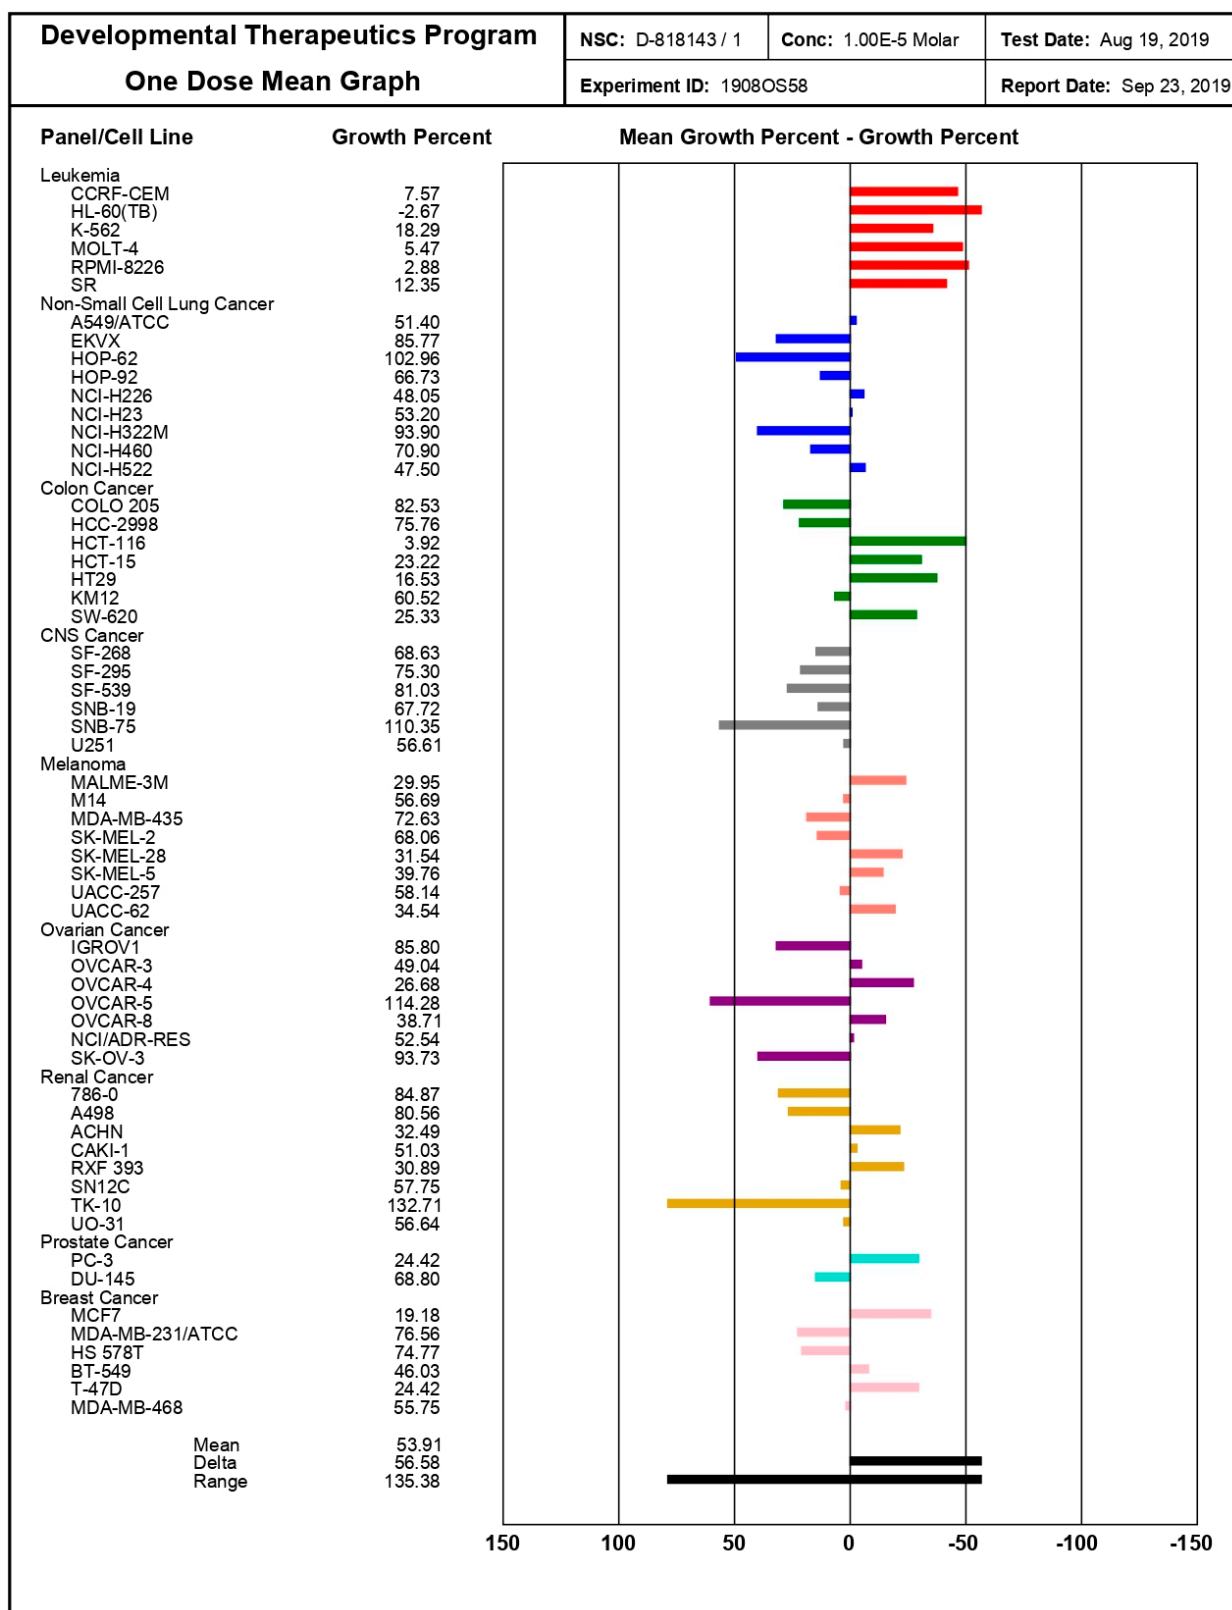



**Figure S13.** *In vitro* anticancer activity of compound **6** against 60 human cancer cell lines in concentrations 0.01 – 100  $\mu$ M

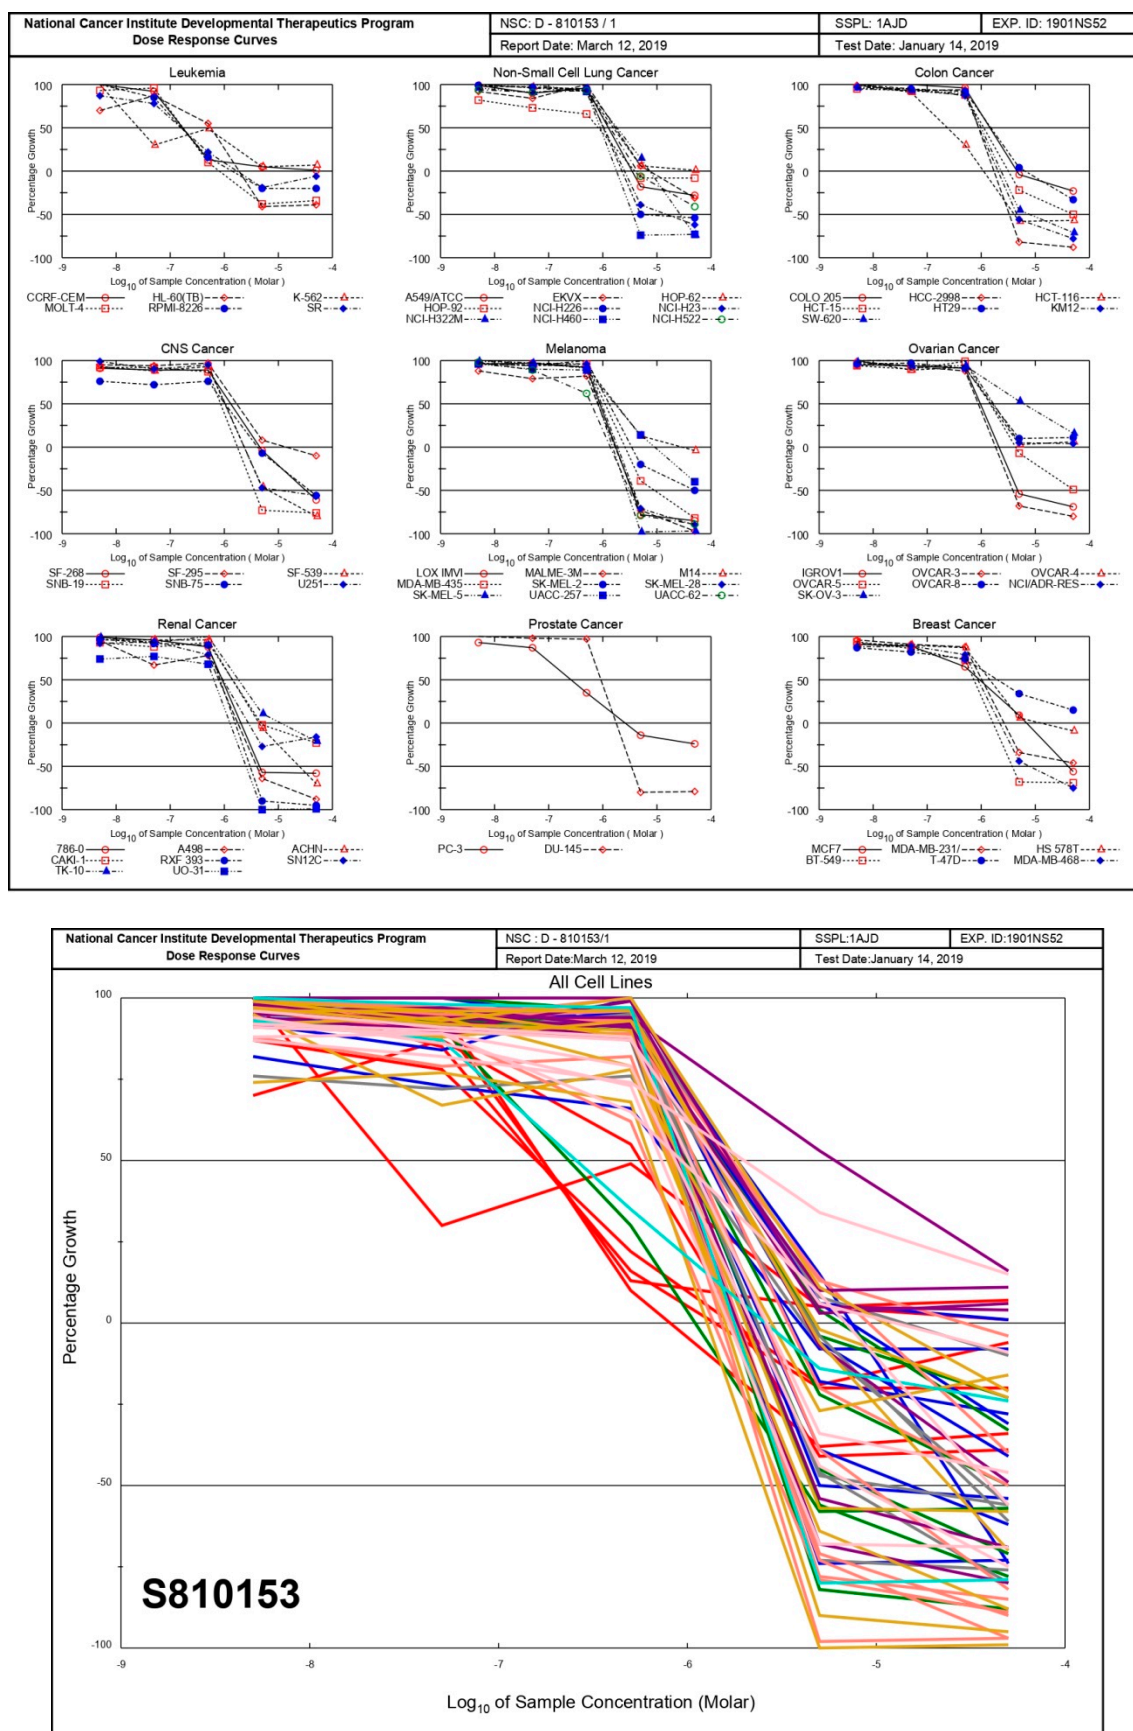

**National Cancer Institute Developmental Therapeutics Program  
In-Vitro Testing Results**

| NSC : D - 810153 / 1         |           |       |       | Experiment ID : 1901NS52              |       |       |       |      |      |      |      | Test Type : 08 |         |           |           | Units : Molar |  |
|------------------------------|-----------|-------|-------|---------------------------------------|-------|-------|-------|------|------|------|------|----------------|---------|-----------|-----------|---------------|--|
| Report Date : March 12, 2019 |           |       |       | Test Date : January 14, 2019          |       |       |       |      |      |      |      | QNS :          |         |           |           | MC :          |  |
| COMI : 3-oxo-F-2sr-3NK       |           |       |       | Stain Reagent : SRB Dual-Pass Related |       |       |       |      |      |      |      | SSPL : 1AJD    |         |           |           |               |  |
| Log10 Concentration          |           |       |       |                                       |       |       |       |      |      |      |      |                |         |           |           |               |  |
| Panel/Cell Line              | Time Zero | Ctrl  | -8.3  | -7.3                                  | -6.3  | -5.3  | -4.3  | -8.3 | -7.3 | -6.3 | -5.3 | -4.3           | GI50    | TGI       | LC50      |               |  |
| Leukemia                     |           |       |       |                                       |       |       |       |      |      |      |      |                |         |           |           |               |  |
| CCRF-CEM                     | 0.437     | 2.443 | 2.467 | 2.275                                 | 0.696 | 0.535 | 0.466 | 101  | 92   | 13   | 5    | 1              | 1.69E-7 | > 5.00E-5 | > 5.00E-5 |               |  |
| HL-60(TB)                    | 0.908     | 2.684 | 2.159 | 2.449                                 | 1.880 | 0.538 | 0.550 | 70   | 87   | 55   | -41  | -39            | 5.60E-7 | 1.87E-6   | > 5.00E-5 |               |  |
| K-562                        | 0.163     | 1.581 | 1.618 | 0.585                                 | 0.855 | 0.228 | 0.258 | 103  | 30   | 49   | 5    | 7              | 2.64E-8 | > 5.00E-5 | > 5.00E-5 |               |  |
| MOLT-4                       | 0.709     | 2.732 | 2.595 | 2.652                                 | 0.917 | 0.443 | 0.471 | 93   | 96   | 10   | -38  | -34            | 1.72E-7 | 8.21E-7   | > 5.00E-5 |               |  |
| RPMI-8226                    | 0.901     | 2.675 | 2.681 | 2.405                                 | 1.182 | 0.718 | 0.719 | 100  | 85   | 16   | -20  | -20            | 1.60E-7 | 1.37E-6   | > 5.00E-5 |               |  |
| SR                           | 0.448     | 1.554 | 1.415 | 1.308                                 | 0.696 | 0.364 | 0.420 | 87   | 78   | 22   | -19  | -6             | 1.58E-7 | 1.75E-6   | > 5.00E-5 |               |  |
| Non-Small Cell Lung Cancer   |           |       |       |                                       |       |       |       |      |      |      |      |                |         |           |           |               |  |
| A549/ATCC                    | 0.420     | 2.203 | 2.185 | 2.018                                 | 2.136 | 0.346 | 0.303 | 99   | 90   | 96   | -18  | -28            | 1.27E-6 | 3.50E-6   | > 5.00E-5 |               |  |
| EKVX                         | 0.753     | 1.663 | 1.587 | 1.521                                 | 1.669 | 0.810 | 0.518 | 92   | 84   | 101  | 6    | -31            | 1.72E-6 | 7.32E-6   | > 5.00E-5 |               |  |
| HOP-62                       | 0.758     | 2.664 | 2.624 | 2.605                                 | 2.530 | 0.874 | 0.784 | 98   | 97   | 93   | 6    | 1              | 1.56E-6 | > 5.00E-5 | > 5.00E-5 |               |  |
| HOP-92                       | 1.219     | 2.045 | 1.895 | 1.820                                 | 1.764 | 1.125 | 1.127 | 82   | 73   | 66   | -8   | -8             | 8.23E-7 | 3.92E-6   | > 5.00E-5 |               |  |
| NCI-H226                     | 1.223     | 2.808 | 2.798 | 2.756                                 | 2.722 | 0.607 | 0.557 | 99   | 97   | 95   | -50  | -54            | 1.02E-6 | 2.25E-6   | 4.97E-6   |               |  |
| NCI-H23                      | 0.599     | 2.141 | 2.144 | 2.079                                 | 2.015 | 0.363 | 0.230 | 100  | 96   | 92   | -39  | -62            | 1.04E-6 | 2.50E-6   | 1.49E-5   |               |  |
| NCI-H322M                    | 0.663     | 1.933 | 1.884 | 1.816                                 | 1.864 | 0.857 | 0.171 | 96   | 91   | 95   | 15   | -74            | 1.82E-6 | 7.41E-6   | 2.68E-5   |               |  |
| NCI-H460                     | 0.429     | 2.805 | 2.848 | 2.825                                 | 2.613 | 0.113 | 0.115 | 102  | 101  | 92   | -74  | -73            | 8.95E-7 | 1.79E-6   | 3.59E-6   |               |  |
| NCI-H522                     | 0.888     | 2.628 | 2.522 | 2.469                                 | 2.503 | 0.839 | 0.520 | 94   | 91   | 93   | -6   | -41            | 1.36E-6 | 4.39E-6   | > 5.00E-5 |               |  |
| Colon Cancer                 |           |       |       |                                       |       |       |       |      |      |      |      |                |         |           |           |               |  |
| COLO 205                     | 0.484     | 2.048 | 2.098 | 2.068                                 | 1.983 | 0.463 | 0.371 | 103  | 101  | 96   | -4   | -23            | 1.43E-6 | 4.53E-6   | > 5.00E-5 |               |  |
| HCC-2998                     | 0.731     | 2.671 | 2.654 | 2.537                                 | 2.560 | 0.133 | 0.089 | 99   | 93   | 94   | -82  | -88            | 8.92E-7 | 1.72E-6   | 3.30E-6   |               |  |
| HCT-116                      | 0.236     | 2.490 | 2.496 | 2.289                                 | 0.903 | 0.099 | 0.102 | 100  | 91   | 30   | -58  | -57            | 2.33E-7 | 1.09E-6   | 4.05E-6   |               |  |
| HCT-15                       | 0.249     | 1.679 | 1.611 | 1.578                                 | 1.508 | 0.195 | 0.126 | 95   | 93   | 88   | -22  | -50            | 1.11E-6 | 3.17E-6   | > 5.00E-5 |               |  |
| HT29                         | 0.259     | 1.856 | 1.873 | 1.777                                 | 1.732 | 0.320 | 0.174 | 101  | 95   | 92   | 4    | -33            | 1.50E-6 | 6.34E-6   | > 5.00E-5 |               |  |
| KM12                         | 0.581     | 2.749 | 2.686 | 2.648                                 | 2.477 | 0.256 | 0.126 | 97   | 95   | 87   | -56  | -78            | 9.12E-7 | 2.03E-6   | 4.54E-6   |               |  |
| SW-620                       | 0.450     | 1.863 | 1.800 | 1.758                                 | 1.716 | 0.247 | 0.130 | 96   | 93   | 90   | -45  | -71            | 9.84E-7 | 2.31E-6   | 7.65E-6   |               |  |
| CNS Cancer                   |           |       |       |                                       |       |       |       |      |      |      |      |                |         |           |           |               |  |
| SF-268                       | 0.949     | 2.458 | 2.327 | 2.294                                 | 2.287 | 0.911 | 0.372 | 91   | 89   | 89   | -4   | -61            | 1.31E-6 | 4.53E-6   | 3.23E-5   |               |  |
| SF-295                       | 0.933     | 3.000 | 2.907 | 2.872                                 | 2.947 | 1.089 | 0.842 | 95   | 94   | 97   | 8    | -10            | 1.69E-6 | 1.37E-5   | > 5.00E-5 |               |  |
| SF-539                       | 0.585     | 2.121 | 2.012 | 1.943                                 | 2.019 | 0.313 | 0.115 | 93   | 88   | 93   | -46  | -80            | 1.02E-6 | 2.33E-6   | 6.34E-6   |               |  |
| SNB-19                       | 0.780     | 2.517 | 2.370 | 2.374                                 | 2.295 | 0.208 | 0.185 | 92   | 92   | 87   | -73  | -76            | 8.53E-7 | 1.75E-6   | 3.58E-6   |               |  |
| SNB-75                       | 1.190     | 2.041 | 1.839 | 1.803                                 | 1.835 | 1.105 | 0.527 | 76   | 72   | 76   | -7   | -56            | 1.02E-6 | 4.10E-6   | 3.81E-5   |               |  |
| U251                         | 0.361     | 1.860 | 1.843 | 1.717                                 | 1.791 | 0.193 | 0.159 | 99   | 90   | 95   | -47  | -56            | 1.04E-6 | 2.35E-6   | 1.17E-5   |               |  |
| Melanoma                     |           |       |       |                                       |       |       |       |      |      |      |      |                |         |           |           |               |  |
| LOX IMVI                     | 0.445     | 2.927 | 2.837 | 2.841                                 | 2.733 | 0.098 | 0.066 | 96   | 97   | 92   | -78  | -85            | 8.85E-7 | 1.74E-6   | 3.42E-6   |               |  |
| MALME-3M                     | 0.876     | 1.979 | 1.842 | 1.743                                 | 1.777 | 0.233 | 0.024 | 88   | 79   | 82   | -73  | -97            | 8.00E-7 | 1.68E-6   | 3.53E-6   |               |  |
| M14                          | 0.547     | 2.493 | 2.408 | 2.401                                 | 2.366 | 0.808 | 0.526 | 96   | 95   | 93   | 13   | -4             | 1.74E-6 | 2.99E-5   | > 5.00E-5 |               |  |
| MDA-MB-435                   | 0.766     | 2.919 | 2.848 | 2.795                                 | 2.825 | 0.467 | 0.137 | 97   | 94   | 96   | -39  | -82            | 1.09E-6 | 2.57E-6   | 8.98E-6   |               |  |
| SK-MEL-2                     | 1.055     | 2.781 | 2.719 | 2.675                                 | 2.785 | 0.841 | 0.527 | 96   | 94   | 100  | -20  | -50            | 1.30E-6 | 3.39E-6   | 4.98E-5   |               |  |
| SK-MEL-28                    | 0.812     | 2.498 | 2.505 | 2.450                                 | 2.429 | 0.240 | 0.085 | 100  | 97   | 96   | -71  | -90            | 9.44E-7 | 1.88E-6   | 3.76E-6   |               |  |
| SK-MEL-5                     | 0.982     | 3.242 | 3.221 | 3.181                                 | 3.036 | 0.024 | 0.029 | 99   | 97   | 91   | -98  | -97            | 8.24E-7 | 1.52E-6   | 2.80E-6   |               |  |
| UACC-257                     | 1.152     | 2.628 | 2.566 | 2.484                                 | 2.471 | 1.364 | 0.689 | 96   | 90   | 89   | 14   | -40            | 1.67E-6 | 9.16E-6   | > 5.00E-5 |               |  |
| UACC-62                      | 1.153     | 3.010 | 2.968 | 2.813                                 | 2.296 | 0.246 | 0.125 | 98   | 89   | 62   | -79  | -89            | 6.04E-7 | 1.37E-6   | 3.12E-6   |               |  |
| Ovarian Cancer               |           |       |       |                                       |       |       |       |      |      |      |      |                |         |           |           |               |  |
| IGROV1                       | 0.550     | 2.231 | 2.141 | 2.127                                 | 2.079 | 0.254 | 0.169 | 95   | 94   | 91   | -54  | -69            | 9.59E-7 | 2.12E-6   | 4.71E-6   |               |  |
| OVCAR-3                      | 0.634     | 2.100 | 2.080 | 1.991                                 | 1.929 | 0.203 | 0.127 | 99   | 93   | 88   | -68  | -80            | 8.79E-7 | 1.84E-6   | 3.84E-6   |               |  |
| OVCAR-4                      | 0.694     | 1.533 | 1.536 | 1.444                                 | 1.468 | 0.718 | 0.747 | 100  | 89   | 92   | 3    | 6              | 1.49E-6 | > 5.00E-5 | > 5.00E-5 |               |  |
| OVCAR-5                      | 0.617     | 1.777 | 1.711 | 1.658                                 | 1.769 | 0.576 | 0.316 | 94   | 90   | 99   | -7   | -49            | 1.46E-6 | 4.32E-6   | > 5.00E-5 |               |  |
| OVCAR-8                      | 0.474     | 2.182 | 2.112 | 2.133                                 | 2.035 | 0.638 | 0.664 | 96   | 97   | 91   | 10   | 11             | 1.60E-6 | > 5.00E-5 | > 5.00E-5 |               |  |
| NCI/ADR-RES                  | 0.543     | 1.864 | 1.876 | 1.860                                 | 1.881 | 0.608 | 0.602 | 101  | 100  | 101  | 5    | 4              | 1.70E-6 | > 5.00E-5 | > 5.00E-5 |               |  |
| SK-OV-3                      | 0.914     | 2.247 | 2.217 | 2.171                                 | 2.166 | 1.616 | 1.126 | 98   | 94   | 94   | 53   | 16             | 5.90E-6 | > 5.00E-5 | > 5.00E-5 |               |  |
| Renal Cancer                 |           |       |       |                                       |       |       |       |      |      |      |      |                |         |           |           |               |  |
| 786-0                        | 0.836     | 2.935 | 2.923 | 2.848                                 | 2.682 | 0.362 | 0.351 | 99   | 96   | 88   | -57  | -58            | 9.15E-7 | 2.03E-6   | 4.49E-6   |               |  |
| A498                         | 2.033     | 2.648 | 2.619 | 2.447                                 | 2.511 | 0.726 | 0.240 | 95   | 67   | 78   | -64  | -88            | 7.83E-7 | 1.76E-6   | 3.97E-6   |               |  |
| ACHN                         | 0.450     | 1.967 | 1.913 | 1.908                                 | 1.907 | 0.424 | 0.136 | 96   | 96   | 96   | -6   | -70            | 1.41E-6 | 4.38E-6   | 2.44E-5   |               |  |
| CAKI-1                       | 0.880     | 2.478 | 2.368 | 2.287                                 | 2.369 | 0.863 | 0.676 | 93   | 88   | 93   | -2   | -23            | 1.42E-6 | 4.77E-6   | > 5.00E-5 |               |  |
| RXF 393                      | 0.904     | 1.517 | 1.501 | 1.468                                 | 1.456 | 0.090 | 0.048 | 97   | 92   | 90   | -90  | -95            | 8.34E-7 | 1.58E-6   | 2.99E-6   |               |  |
| SN12C                        | 0.660     | 2.827 | 2.660 | 2.688                                 | 2.368 | 0.481 | 0.552 | 92   | 94   | 79   | -27  | -16            | 9.35E-7 | 2.77E-6   | > 5.00E-5 |               |  |
| TK-10                        | 0.576     | 2.044 | 2.031 | 1.941                                 | 2.042 | 0.744 | 0.455 | 99   | 93   | 100  | 11   | -21            | 1.83E-6 | 1.12E-5   | > 5.00E-5 |               |  |
| UO-31                        | 1.055     | 2.370 | 2.026 | 2.065                                 | 1.952 |       | 0.008 | 74   | 77   | 68   | -100 | -99            | 6.41E-7 | 1.27E-6   | 2.52E-6   |               |  |
| Prostate Cancer              |           |       |       |                                       |       |       |       |      |      |      |      |                |         |           |           |               |  |
| PC-3                         | 0.610     | 2.557 | 2.411 | 2.300                                 | 1.286 | 0.528 | 0.462 | 93   | 87   | 35   | -14  | -24            | 2.55E-7 | 2.62E-6   | > 5.00E-5 |               |  |
| DU-145                       | 0.500     | 2.020 | 2.099 | 1.994                                 | 1.980 | 0.101 | 0.106 | 105  | 98   | 97   | -80  | -79            | 9.25E-7 | 1.77E-6   | 3.39E-6   |               |  |
| Breast Cancer                |           |       |       |                                       |       |       |       |      |      |      |      |                |         |           |           |               |  |
| MCF7                         | 0.494     | 2.442 | 2.274 | 2.226                                 | 1.752 | 0.665 | 0.219 | 91   | 89   | 65   | 9    | -56            | 9.12E-7 | 6.84E-6   | 4.08E-5   |               |  |
| MDA-MB-231/ATCC              | 0.676     | 1.663 | 1.624 | 1.574                                 | 1.544 | 0.449 | 0.367 | 96   | 91   | 88   | -34  | -46            | 1.03E-6 | 2.64E-6   | > 5.00E-5 |               |  |
| HS 578T                      | 1.244     | 2.193 | 2.115 | 2.099                                 | 2.072 | 1.302 | 1.129 | 92   | 90   | 87   | 6    | -9             | 1.44E-6 | 1.24E-5   | > 5.00E-5 |               |  |
| BT-549                       | 1.117     | 2.299 | 2.226 | 2.132                                 | 1.984 | 0.360 | 0.344 | 94   | 86   | 73   | -68  | -69            | 7.32E-7 | 1.65E-6   | 3.74E-6   |               |  |
| T-47D                        | 0.804     | 2.255 | 2.063 | 1.999                                 | 1.880 | 1.294 | 1.026 | 87   | 82   | 74   | 34   | 15             | 1.98E-6 | > 5.00E-5 | > 5.00E-5 |               |  |
| MDA-MB-468                   | 0.998     | 1.613 | 1.538 | 1.545                                 | 1.483 | 0.560 | 0.253 | 88   | 89   | 79   | -44  | -75            | 8.59E-7 | 2.19E-6   | 7.87E-6   |               |  |

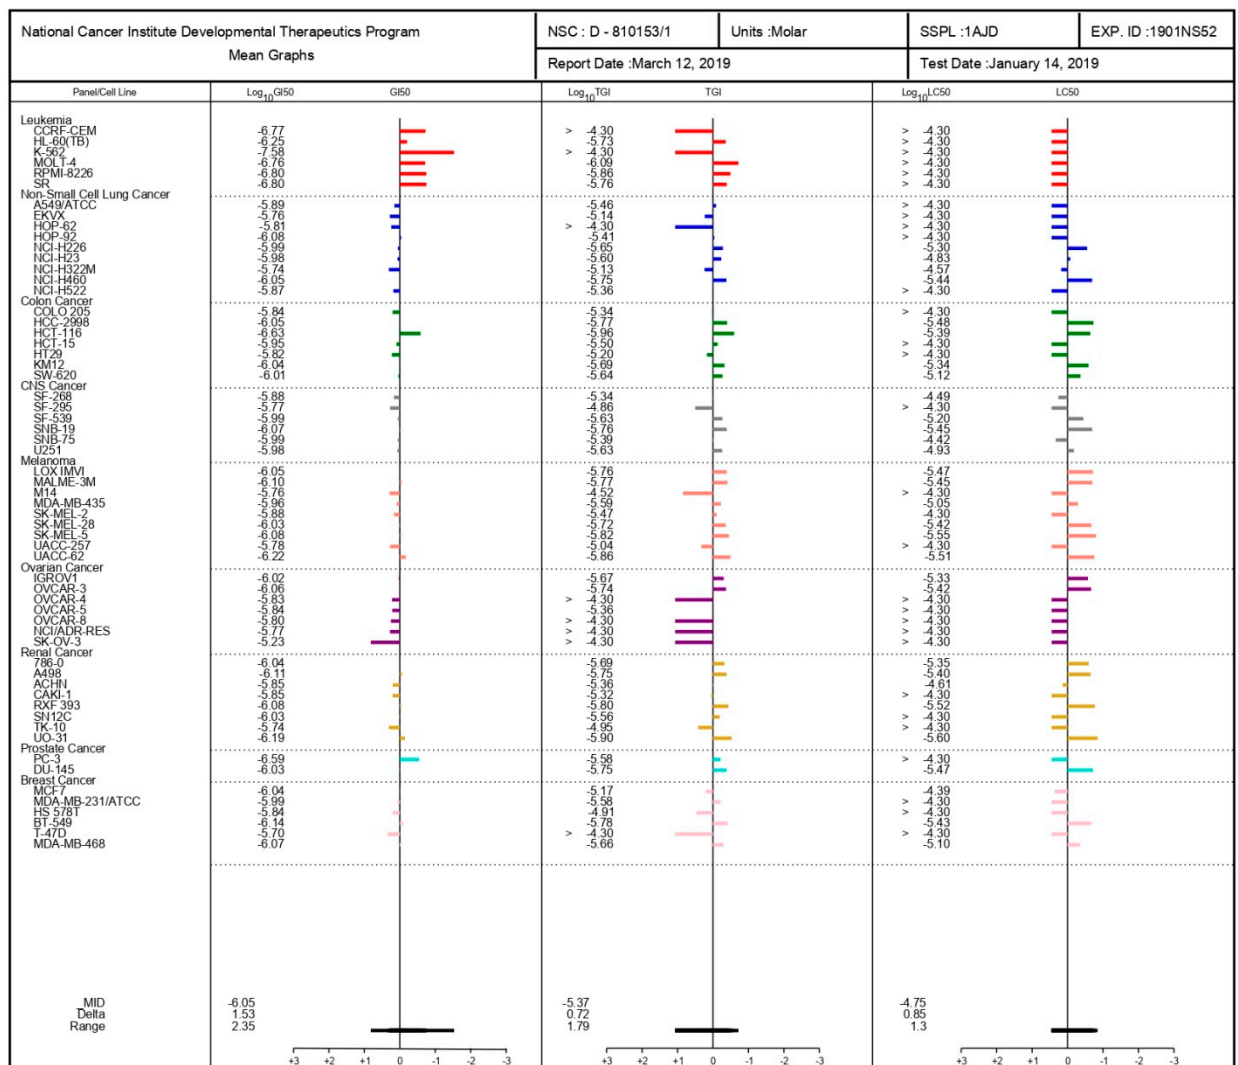

**Figure S14.** *In vitro* anticancer activity of compound **7** against 60 human cancer cell lines in concentrations 0.01 – 100  $\mu$ M

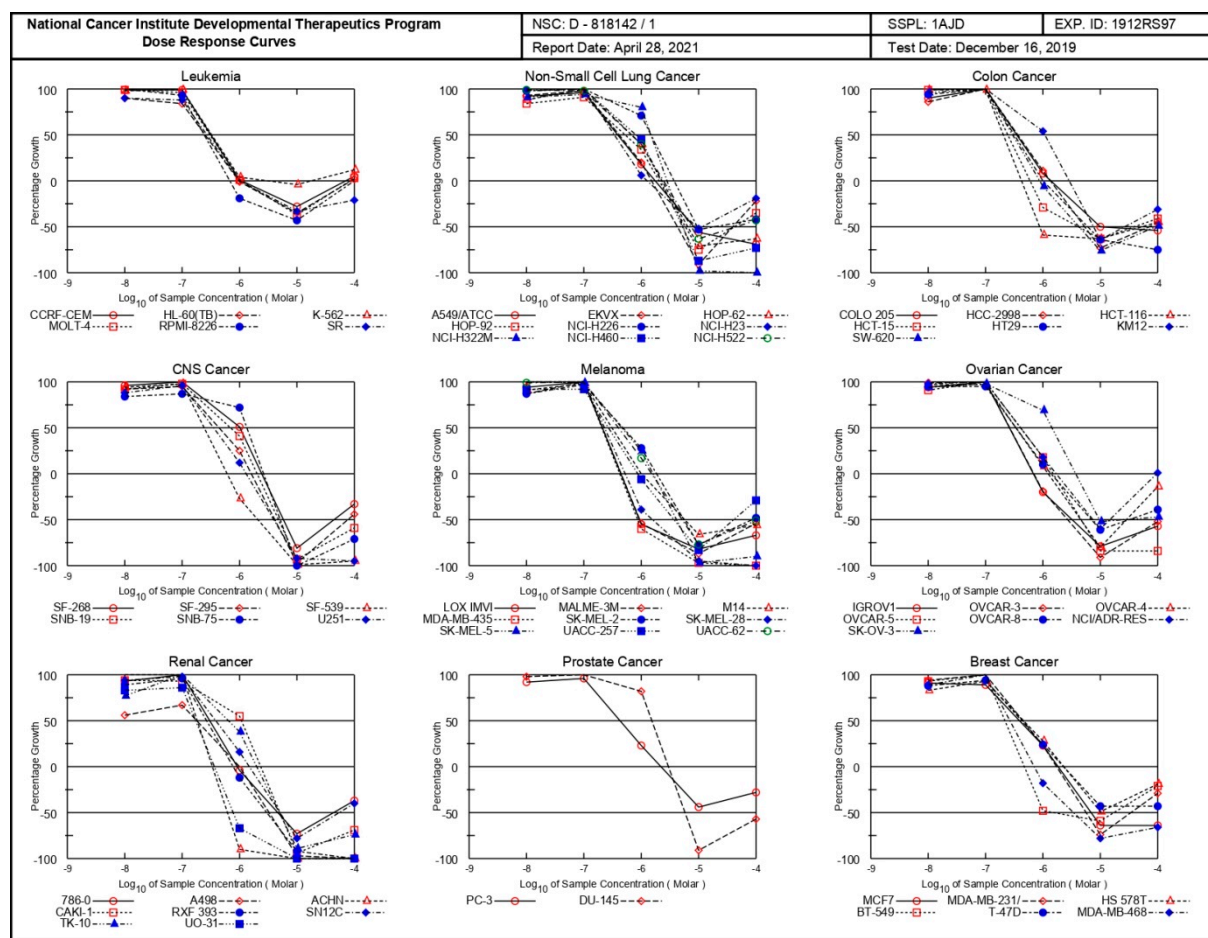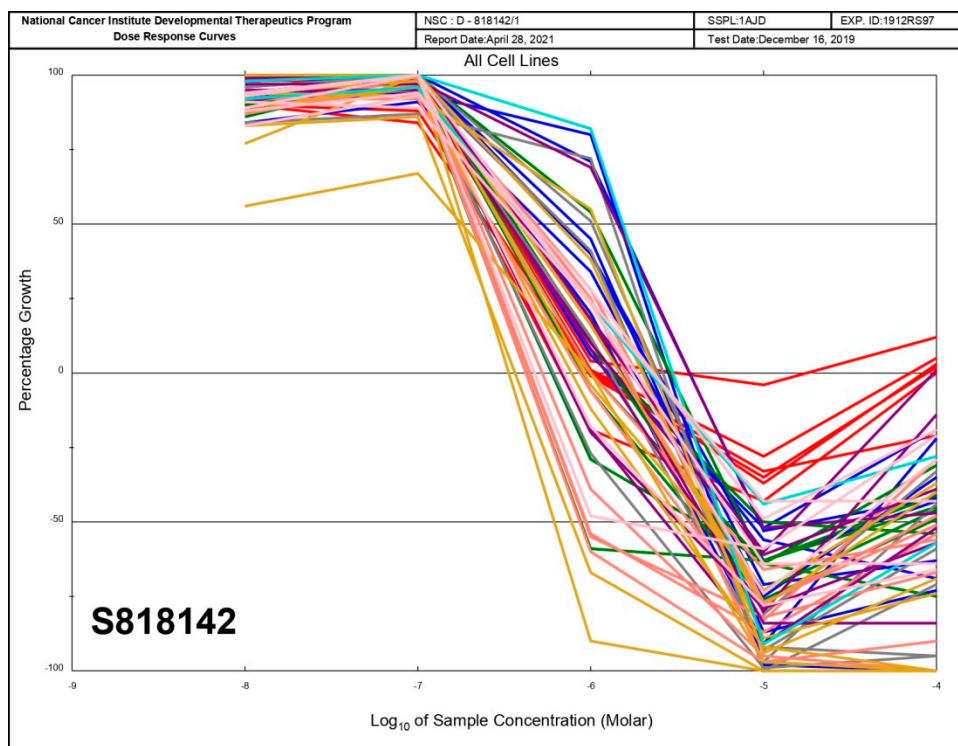

# National Cancer Institute Developmental Therapeutics Program In-Vitro Testing Results

| NSC : D - 818142 / 1         |           |       | Experiment ID : 1912RS97              |       |       |        |        |      |      |      |      |      | Test Type : 08 |         | Units : Molar |  |
|------------------------------|-----------|-------|---------------------------------------|-------|-------|--------|--------|------|------|------|------|------|----------------|---------|---------------|--|
| Report Date : April 28, 2021 |           |       | Test Date : December 16, 2019         |       |       |        |        |      |      |      |      |      | QNS :          |         | MC :          |  |
| COMI : OMeBk-2,30-3NK        |           |       | Stain Reagent : SRB Dual-Pass Related |       |       |        |        |      |      |      |      |      | SSPL : 1AJD    |         |               |  |
| Log10 Concentration          |           |       |                                       |       |       |        |        |      |      |      |      |      |                |         |               |  |
| Panel/Cell Line              | Time Zero | Ctrl  | -8.0                                  | -7.0  | -6.0  | -5.0   | -4.0   | -8.0 | -7.0 | -6.0 | -5.0 | -4.0 | GI50           | TGI     | LC50          |  |
| Leukemia                     |           |       |                                       |       |       |        |        |      |      |      |      |      |                |         |               |  |
| CCRF-CEM                     | 0.487     | 3.148 | 3.131                                 | 3.111 | 0.506 | 0.351  | 0.627  | 99   | 99   | 1    | -28  | 5    | 3.14E-7        |         | > 1.00E-4     |  |
| HL-60(TB)                    | 0.406     | 2.016 | 1.850                                 | 1.752 | 0.401 | 0.262  | 0.432  | 90   | 84   | -1   | -35  | 2    | 2.48E-7        |         | > 1.00E-4     |  |
| K-562                        | 0.188     | 2.259 | 2.216                                 | 2.245 | 0.264 | 0.180  | 0.434  | 98   | 99   | 4    | -4   | 12   | 3.28E-7        |         | > 1.00E-4     |  |
| MOLT-4                       | 0.547     | 2.729 | 2.710                                 | 2.647 | 0.558 | 0.346  | 0.619  | 99   | 96   | 1    | -37  | 3    | 3.04E-7        |         | > 1.00E-4     |  |
| RPMI-8226                    | 0.785     | 3.076 | 3.082                                 | 2.907 | 0.639 | 0.447  | 0.781  | 100  | 93   | -19  | -43  |      | 2.42E-7        | 6.80E-7 | > 1.00E-4     |  |
| SR                           | 0.274     | 1.575 | 1.441                                 | 1.413 | 0.272 | 0.183  | 0.218  | 90   | 88   |      | -33  | -21  | 2.66E-7        | 9.81E-7 | > 1.00E-4     |  |
| Non-Small Cell Lung Cancer   |           |       |                                       |       |       |        |        |      |      |      |      |      |                |         |               |  |
| A549/ATCC                    | 0.451     | 2.512 | 2.349                                 | 2.424 | 0.816 | 0.201  | 0.142  | 92   | 96   | 18   | -56  | -69  | 3.85E-7        | 1.74E-6 | 8.40E-6       |  |
| EKVX                         | 0.739     | 2.179 | 2.073                                 | 2.157 | 1.021 | 0.065  | 0.575  | 93   | 98   | 20   | -91  | -22  | 4.12E-7        | 1.50E-6 |               |  |
| HOP-62                       | 0.765     | 2.739 | 2.505                                 | 2.796 | 1.551 | 0.220  | 0.282  | 88   | 103  | 40   | -71  | -63  | 6.89E-7        | 2.28E-6 | 6.44E-6       |  |
| HOP-92                       | 1.240     | 2.019 | 1.892                                 | 1.946 | 1.507 | 0.307  | 0.801  | 84   | 91   | 34   | -75  | -35  | 5.26E-7        | 2.06E-6 |               |  |
| NCI-H226                     | 0.851     | 1.506 | 1.496                                 | 1.552 | 1.316 | 0.404  | 0.495  | 98   | 107  | 71   | -53  | -42  | 1.48E-6        | 3.76E-6 |               |  |
| NCI-H23                      | 0.613     | 2.131 | 2.105                                 | 2.156 | 0.700 | 0.297  | 0.499  | 98   | 102  | 6    | -52  | -19  | 3.46E-7        | 1.26E-6 |               |  |
| NCI-H322M                    | 0.736     | 2.174 | 2.051                                 | 2.095 | 1.888 | 0.017  | -0.100 | 91   | 94   | 80   | -98  | -100 | 1.48E-6        | 2.82E-6 | 5.39E-6       |  |
| NCI-H460                     | 0.403     | 3.227 | 3.239                                 | 3.248 | 1.686 | 0.053  | 0.108  | 100  | 101  | 45   | -87  | -73  | 8.27E-7        | 2.20E-6 | 5.26E-6       |  |
| NCI-H522                     | 1.646     | 3.270 | 3.251                                 | 3.231 | 2.289 | 0.610  | 0.941  | 99   | 98   | 40   | -63  | -43  | 6.61E-7        | 2.43E-6 |               |  |
| Colon Cancer                 |           |       |                                       |       |       |        |        |      |      |      |      |      |                |         |               |  |
| COLO 205                     | 0.438     | 2.051 | 1.886                                 | 2.088 | 0.561 | 0.219  | 0.202  | 90   | 102  | 8    | -50  | -54  | 3.57E-7        | 1.35E-6 | 9.95E-6       |  |
| HCC-2998                     | 0.812     | 2.701 | 2.427                                 | 2.713 | 1.023 | 0.218  | 0.441  | 86   | 101  | 11   | -73  | -46  | 3.68E-7        | 1.36E-6 |               |  |
| HCT-116                      | 0.279     | 2.470 | 2.439                                 | 2.447 | 0.114 | 0.104  | 0.154  | 99   | 99   | -59  | -63  | -45  | 2.04E-7        | 4.23E-7 |               |  |
| HCT-15                       | 0.280     | 1.661 | 1.649                                 | 1.661 | 0.199 | 0.104  | 0.166  | 99   | 100  | -29  | -63  | -41  | 2.44E-7        | 5.96E-7 |               |  |
| HT29                         | 0.402     | 2.535 | 2.417                                 | 2.543 | 0.411 | 0.143  | 0.102  | 94   | 100  |      | -64  | -75  | 3.19E-7        | 1.02E-6 | 5.99E-6       |  |
| KM12                         | 0.607     | 3.127 | 3.136                                 | 3.120 | 1.961 | 0.216  | 0.420  | 100  | 100  | 54   | -64  | -31  | 1.08E-6        | 2.85E-6 |               |  |
| SW-620                       | 0.319     | 2.556 | 2.469                                 | 2.588 | 0.299 | 0.076  | 0.164  | 96   | 101  | -6   | -76  | -49  | 3.00E-7        | 8.72E-7 |               |  |
| CNS Cancer                   |           |       |                                       |       |       |        |        |      |      |      |      |      |                |         |               |  |
| SF-268                       | 0.931     | 3.000 | 2.915                                 | 3.004 | 1.981 | 0.175  | 0.626  | 96   | 100  | 51   | -81  | -33  | 1.01E-6        | 2.42E-6 |               |  |
| SF-295                       | 0.443     | 2.244 | 2.108                                 | 2.159 | 0.887 | 0.012  | 0.246  | 92   | 95   | 25   | -97  | -44  | 4.37E-7        | 1.59E-6 |               |  |
| SF-539                       | 0.878     | 3.028 | 2.890                                 | 2.982 | 0.641 | 0.010  | 0.046  | 94   | 98   | -27  | -99  | -95  | 2.42E-7        | 6.08E-7 | 2.09E-6       |  |
| SNB-19                       | 0.591     | 2.211 | 2.086                                 | 2.181 | 1.250 | 0.044  | 0.240  | 92   | 98   | 41   | -93  | -59  | 6.88E-7        | 2.02E-6 | 4.79E-6       |  |
| SNB-75                       | 2.041     | 3.206 | 3.016                                 | 3.059 | 2.883 | -0.001 | 0.601  | 84   | 87   | 72   | -100 | -71  | 1.35E-6        | 2.63E-6 | 5.12E-6       |  |
| U251                         | 0.464     | 2.326 | 2.110                                 | 2.261 | 0.697 | 0.035  | 0.023  | 88   | 96   | 12   | -92  | -95  | 3.58E-7        | 1.32E-6 | 3.94E-6       |  |
| Melanoma                     |           |       |                                       |       |       |        |        |      |      |      |      |      |                |         |               |  |
| LOX IMVI                     | 0.303     | 2.218 | 2.102                                 | 2.216 | 0.137 | 0.055  | 0.099  | 94   | 100  | -55  | -82  | -67  | 2.10E-7        | 4.42E-7 | 9.31E-7       |  |
| MALME-3M                     | 0.604     | 1.508 | 1.388                                 | 1.512 | 0.277 | 0.079  | 0.277  | 87   | 100  | -54  | -87  | -54  | 2.12E-7        | 4.46E-7 | 9.39E-7       |  |
| M14                          | 0.497     | 2.229 | 2.077                                 | 2.195 | 0.504 | 0.170  | 0.218  | 91   | 98   |      | -66  | -56  | 3.10E-7        | 1.01E-6 | 5.77E-6       |  |
| MDA-MB-435                   | 0.791     | 3.257 | 3.249                                 | 3.247 | 0.314 | 0.024  | -0.179 | 100  | 100  | -60  | -97  | -100 | 2.04E-7        | 4.20E-7 | 8.62E-7       |  |
| SK-MEL-2                     | 1.053     | 2.088 | 1.951                                 | 2.053 | 1.339 | 0.237  | 0.553  | 87   | 97   | 28   | -77  | -48  | 4.73E-7        | 1.83E-6 |               |  |
| SK-MEL-28                    | 0.642     | 2.067 | 2.112                                 | 2.141 | 0.389 | 0.033  | -0.001 | 103  | 105  | -39  | -95  | -100 | 2.41E-7        | 5.34E-7 | 1.55E-6       |  |
| SK-MEL-5                     | 0.996     | 3.318 | 3.307                                 | 3.297 | 1.576 | 0.029  | 0.103  | 100  | 99   | 25   | -97  | -90  | 4.60E-7        | 1.60E-6 | 4.11E-6       |  |
| UACC-257                     | 1.150     | 2.786 | 2.659                                 | 2.663 | 1.084 | 0.199  | 0.811  | 92   | 92   | -6   | -83  | -29  | 2.71E-7        | 8.74E-7 |               |  |
| UACC-62                      | 0.905     | 3.029 | 3.010                                 | 3.036 | 1.268 | 0.206  | 0.443  | 99   | 100  | 17   | -77  | -51  | 4.02E-7        | 1.52E-6 | 5.14E-6       |  |
| Ovarian Cancer               |           |       |                                       |       |       |        |        |      |      |      |      |      |                |         |               |  |
| IGROV1                       | 0.436     | 2.117 | 2.014                                 | 2.145 | 0.351 | 0.090  | 0.187  | 94   | 102  | -20  | -79  | -57  | 2.67E-7        | 6.89E-7 | 3.23E-6       |  |
| OVCA-3                       | 0.529     | 1.949 | 1.929                                 | 2.001 | 0.428 | 0.045  | 0.256  | 99   | 104  | -19  | -91  | -52  | 2.74E-7        | 6.99E-7 | 2.67E-6       |  |
| OVCA-4                       | 0.815     | 1.905 | 1.877                                 | 1.868 | 0.902 | 0.162  | 0.701  | 97   | 97   | 8    | -80  | -14  | 3.35E-7        | 1.23E-6 |               |  |
| OVCA-5                       | 0.564     | 1.416 | 1.342                                 | 1.417 | 0.716 | 0.091  | 0.089  | 91   | 100  | 18   | -84  | -84  | 4.07E-7        | 1.50E-6 | 4.65E-6       |  |
| OVCA-8                       | 0.646     | 2.862 | 2.754                                 | 2.748 | 0.866 | 0.249  | 0.395  | 95   | 95   | 10   | -61  | -39  | 3.37E-7        | 1.38E-6 |               |  |
| NCI/ADR-RES                  | 0.454     | 1.655 | 1.632                                 | 1.720 | 0.675 | 0.181  | 0.465  | 98   | 105  | 18   | -60  | 1    | 4.33E-7        |         |               |  |
| SK-OV-3                      | 0.661     | 1.905 | 1.832                                 | 1.883 | 1.516 | 0.318  | 0.349  | 94   | 98   | 69   | -52  | -47  | 1.43E-6        | 3.71E-6 |               |  |
| Renal Cancer                 |           |       |                                       |       |       |        |        |      |      |      |      |      |                |         |               |  |
| 786-0                        | 0.498     | 2.201 | 2.077                                 | 2.227 | 0.480 | 0.132  | 0.313  | 93   | 101  | -4   | -73  | -37  | 3.09E-7        | 9.22E-7 |               |  |
| A498                         | 1.944     | 2.452 | 2.227                                 | 2.287 | 1.939 | 0.053  | -0.127 | 56   | 67   |      | -97  | -100 | 1.81E-7        | 9.91E-7 | 3.26E-6       |  |
| ACHN                         | 0.301     | 1.219 | 1.219                                 | 1.264 | 0.031 | -0.012 | -0.098 | 100  | 105  | -90  | -100 | -100 | 1.91E-7        | 3.46E-7 | 6.25E-7       |  |
| CAKI-1                       | 1.105     | 3.055 | 2.933                                 | 2.922 | 2.184 | 0.062  | 0.343  | 94   | 93   | 55   | -94  | -69  | 1.09E-6        | 2.34E-6 | 5.05E-6       |  |
| RXF-393                      | 1.595     | 2.466 | 2.372                                 | 2.429 | 1.402 | 0.123  | -0.068 | 89   | 96   | -12  | -92  | -100 | 2.65E-7        | 7.72E-7 | 2.97E-6       |  |
| SN12C                        | 0.525     | 2.341 | 2.225                                 | 2.311 | 0.821 | 0.114  | 0.315  | 94   | 98   | 16   | -78  | -40  | 3.88E-7        | 1.49E-6 |               |  |
| TK-10                        | 1.057     | 2.018 | 1.797                                 | 2.062 | 1.418 | 0.120  | 0.279  | 77   | 104  | 38   | -89  | -74  | 6.52E-7        | 1.98E-6 | 4.94E-6       |  |
| UO-31                        | 0.658     | 1.988 | 1.756                                 | 1.802 | 0.217 | -0.005 | -0.035 | 83   | 86   | -67  | -100 | -100 | 1.72E-7        | 3.65E-7 | 7.74E-7       |  |
| Prostate Cancer              |           |       |                                       |       |       |        |        |      |      |      |      |      |                |         |               |  |
| PC-3                         | 0.525     | 2.327 | 2.176                                 | 2.251 | 0.935 | 0.295  | 0.377  | 92   | 96   | 23   | -44  | -28  | 4.23E-7        | 2.19E-6 | > 1.00E-4     |  |
| DU-145                       | 0.888     | 3.077 | 3.024                                 | 3.114 | 2.684 | 0.083  | 0.383  | 98   | 102  | 82   | -91  | -57  | 1.53E-6        | 2.99E-6 | 5.82E-6       |  |
| Breast Cancer                |           |       |                                       |       |       |        |        |      |      |      |      |      |                |         |               |  |
| MCF7                         | 0.517     | 2.347 | 2.179                                 | 2.144 | 0.934 | 0.185  | 0.189  | 91   | 89   | 23   | -64  | -64  | 3.87E-7        | 1.83E-6 | 6.85E-6       |  |
| MDA-MB-231/ATCC              | 0.686     | 1.726 | 1.662                                 | 1.775 | 0.929 | 0.181  | 0.487  | 94   | 105  | 23   | -74  | -29  | 4.71E-7        | 1.74E-6 |               |  |
| HS 578T                      | 1.444     | 2.521 | 2.338                                 | 2.451 | 1.745 | 0.735  | 1.172  | 83   | 93   | 28   | -49  | -19  | 4.60E-7        | 2.30E-6 | > 1.00E-4     |  |
| BT-549                       | 0.928     | 2.093 | 2.015                                 | 2.090 | 0.484 | 0.380  | 0.734  | 93   | 100  | -48  | -59  | -21  | 2.17E-7        | 4.74E-7 |               |  |
| T-47D                        | 0.994     | 2.307 | 2.153                                 | 2.230 | 1.313 | 0.563  | 0.571  | 88   | 94   | 24   | -43  | -43  | 4.29E-7        | 2.28E-6 | > 1.00E-4     |  |
| MDA-MB-468                   | 0.779     | 1.485 | 1.410                                 | 1.500 | 0.641 | 0.170  | 0.264  | 89   | 102  | -18  | -78  | -66  | 2.72E-7        | 7.12E-7 | 3.42E-6       |  |



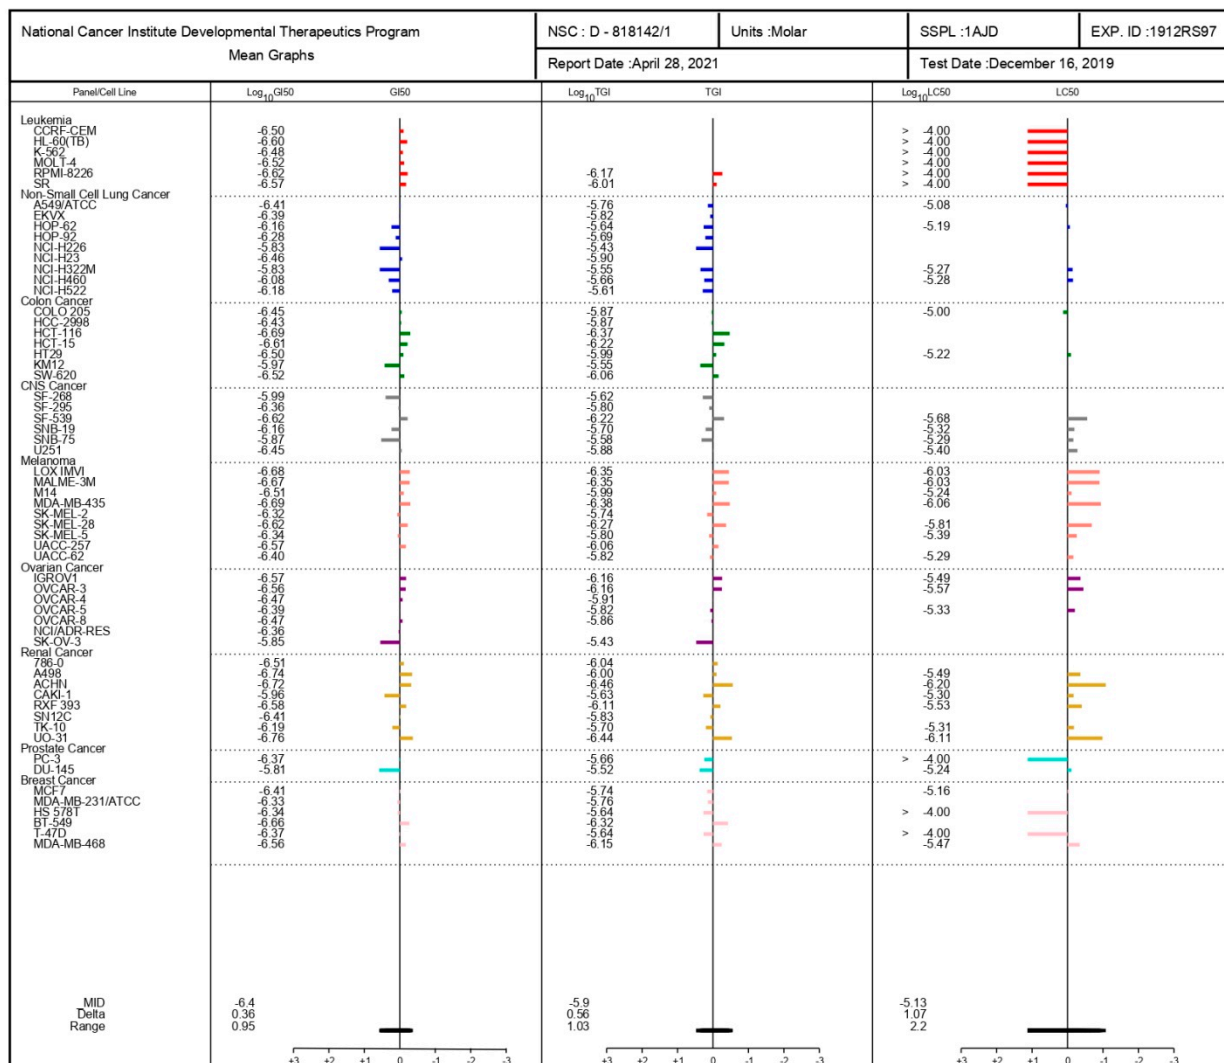

Supplement: s1 [file s1]
